# Supplementary material for: Direct electrochemical α-cyanation of N-protected cyclic amines
Source: Royal Society of Chemistry journal article supplement (doi:10.1039/b816598j), 2008-11-19

# Supporting information

## Direct Electrochemical $\alpha$ -Cyanation of *N*-Protected Cyclic Amines

Samuel Shikuku Libendi, Yosuke Demizu and Osamu Onomura\*  
Graduate School of Biomedical Sciences, Nagasaki University, 1-14 Bunkyo-machi, Nagasaki  
852-8521, Japan.

Fax: +81 95 819 2476; Tel: +81 95 819 2429; E-mail: [onomura@nagasaki-u.ac.jp](mailto:onomura@nagasaki-u.ac.jp).

### **Index Contents:**

NMR charts.....2-37

300MHz, CDCl3

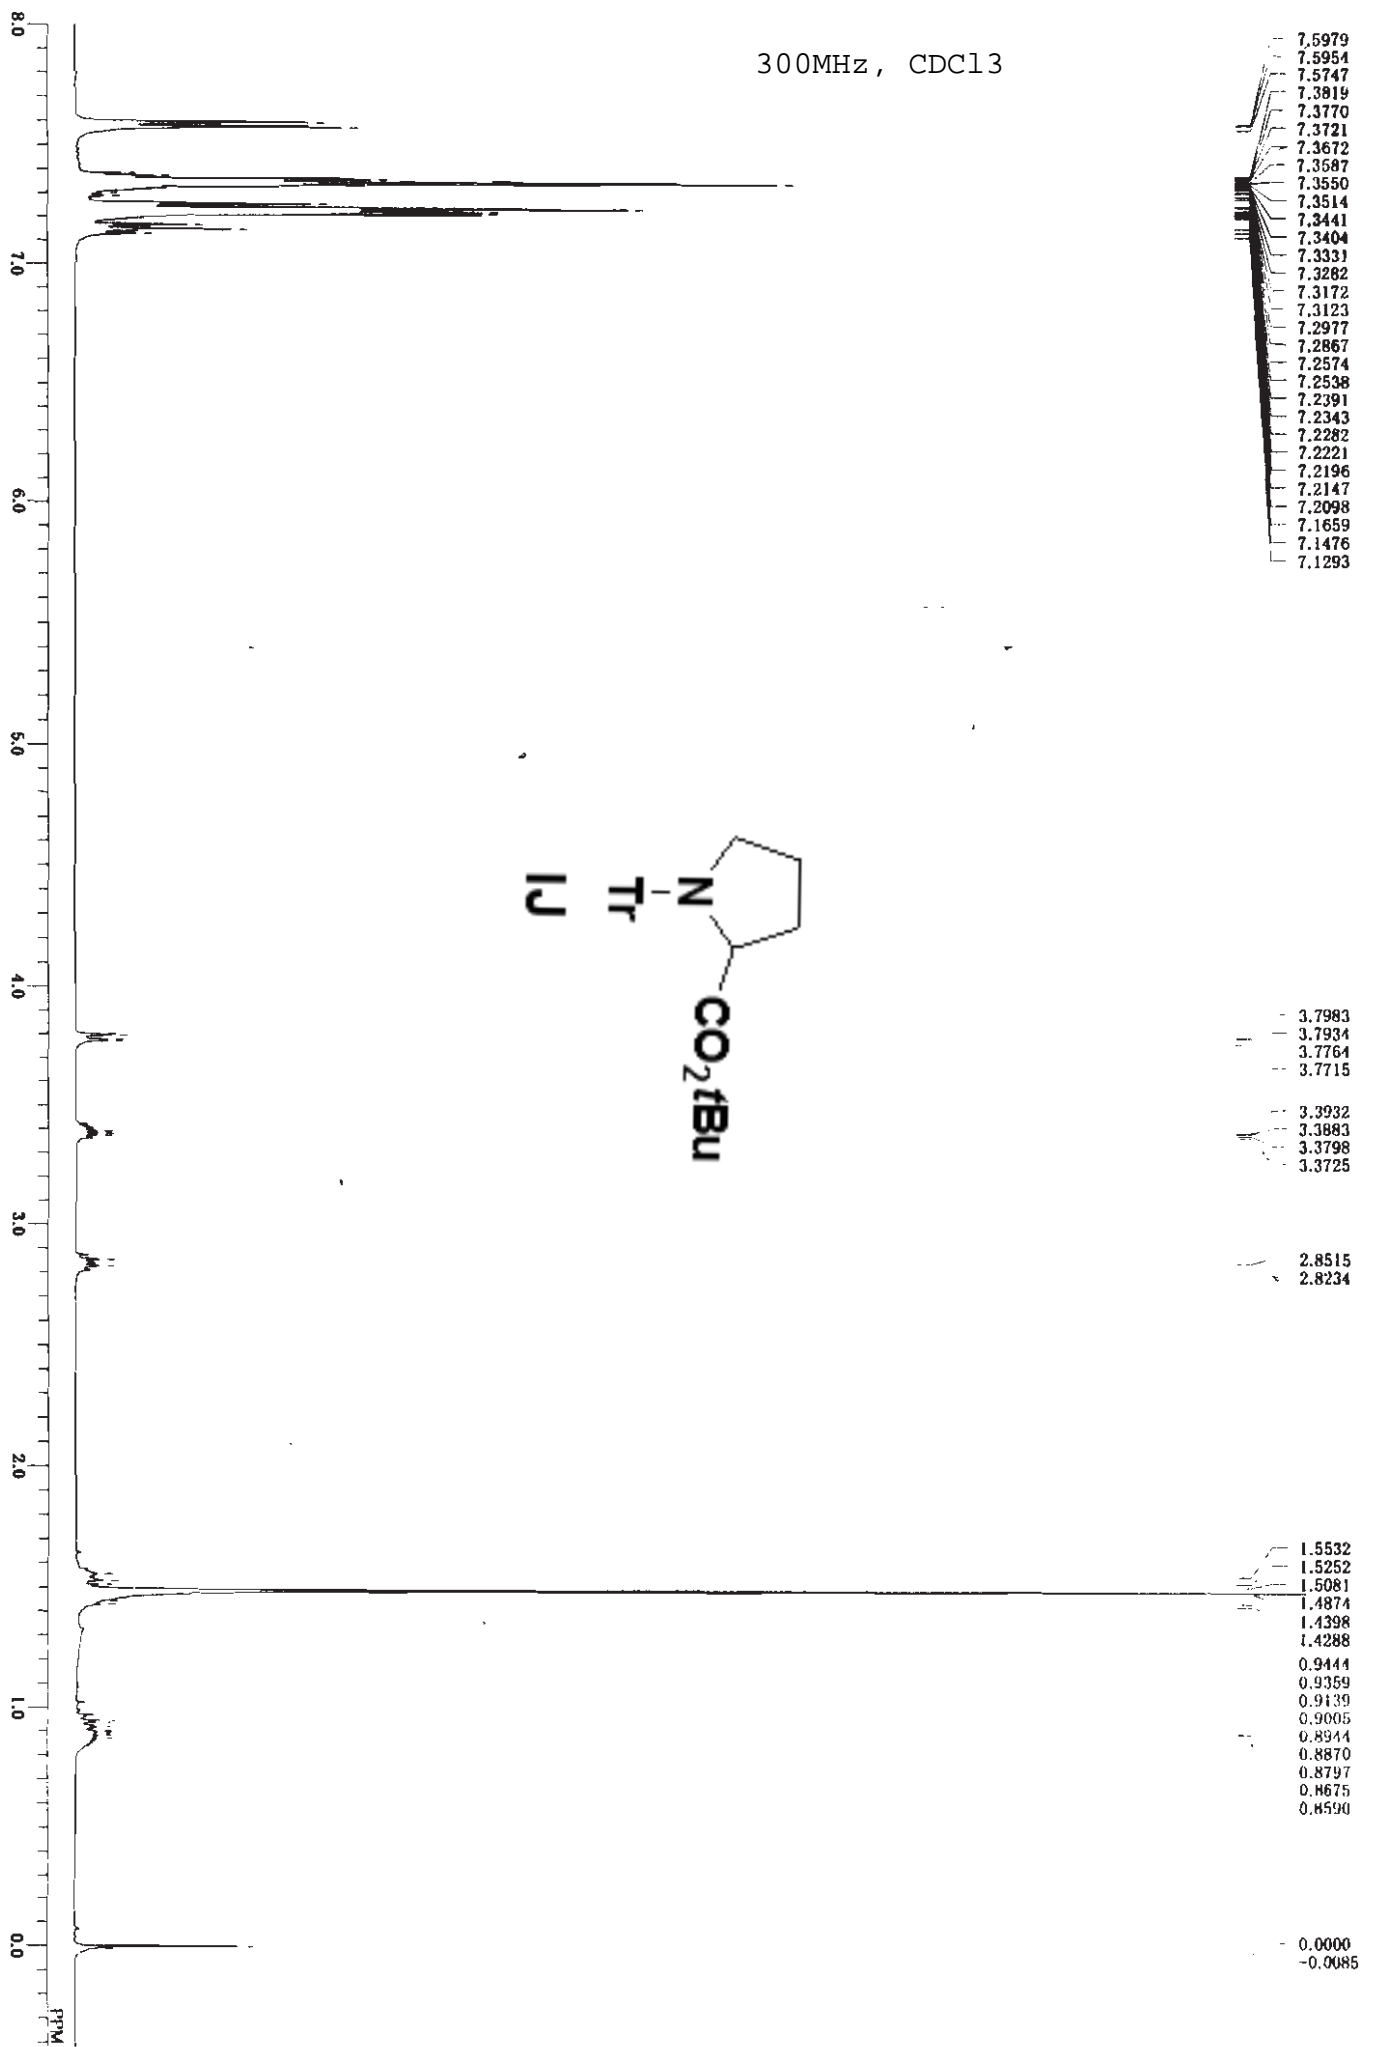

100MHz, CDCl<sub>3</sub>

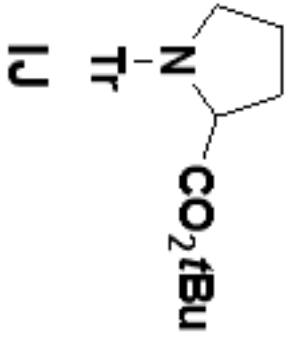

- 175.9570
- 145.1174
- 129.2447
- 127.6311
- 126.0422
- 79.9473
- 77.3128
- 77.0000
- 76.6789
- 63.5972
- 49.9803
- 31.1109
- 28.0484
- 24.2613

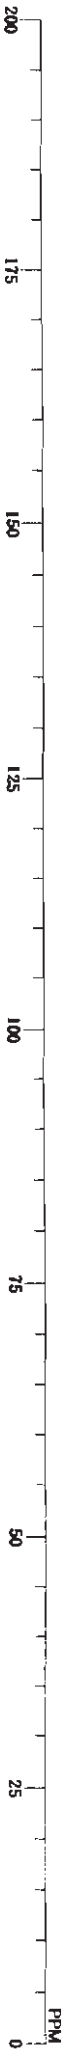



100MHz, CDCl3

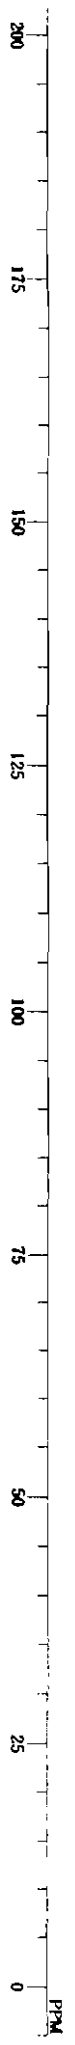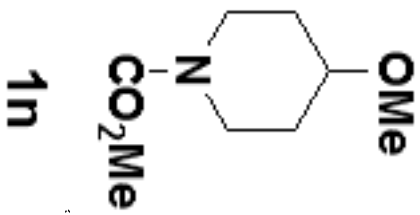

155.9104

77.3211  
77.0000  
76.6789  
75.6087

55.6361  
52.5160

41.1219

30.4276

400MHz, CDCl3

7.3026

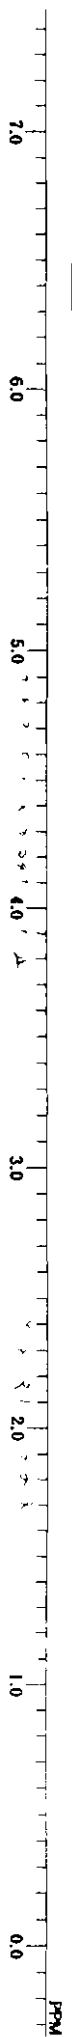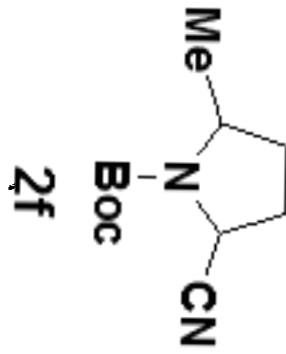

4.4816

4.0936

3.9874

2.2841

2.1950

2.1828

1.9315

1.7338

1.5105

1.5032

1.3727

1.3348

1.3190

1.2568

1.1701

0.0000

100MHz, CDCl3

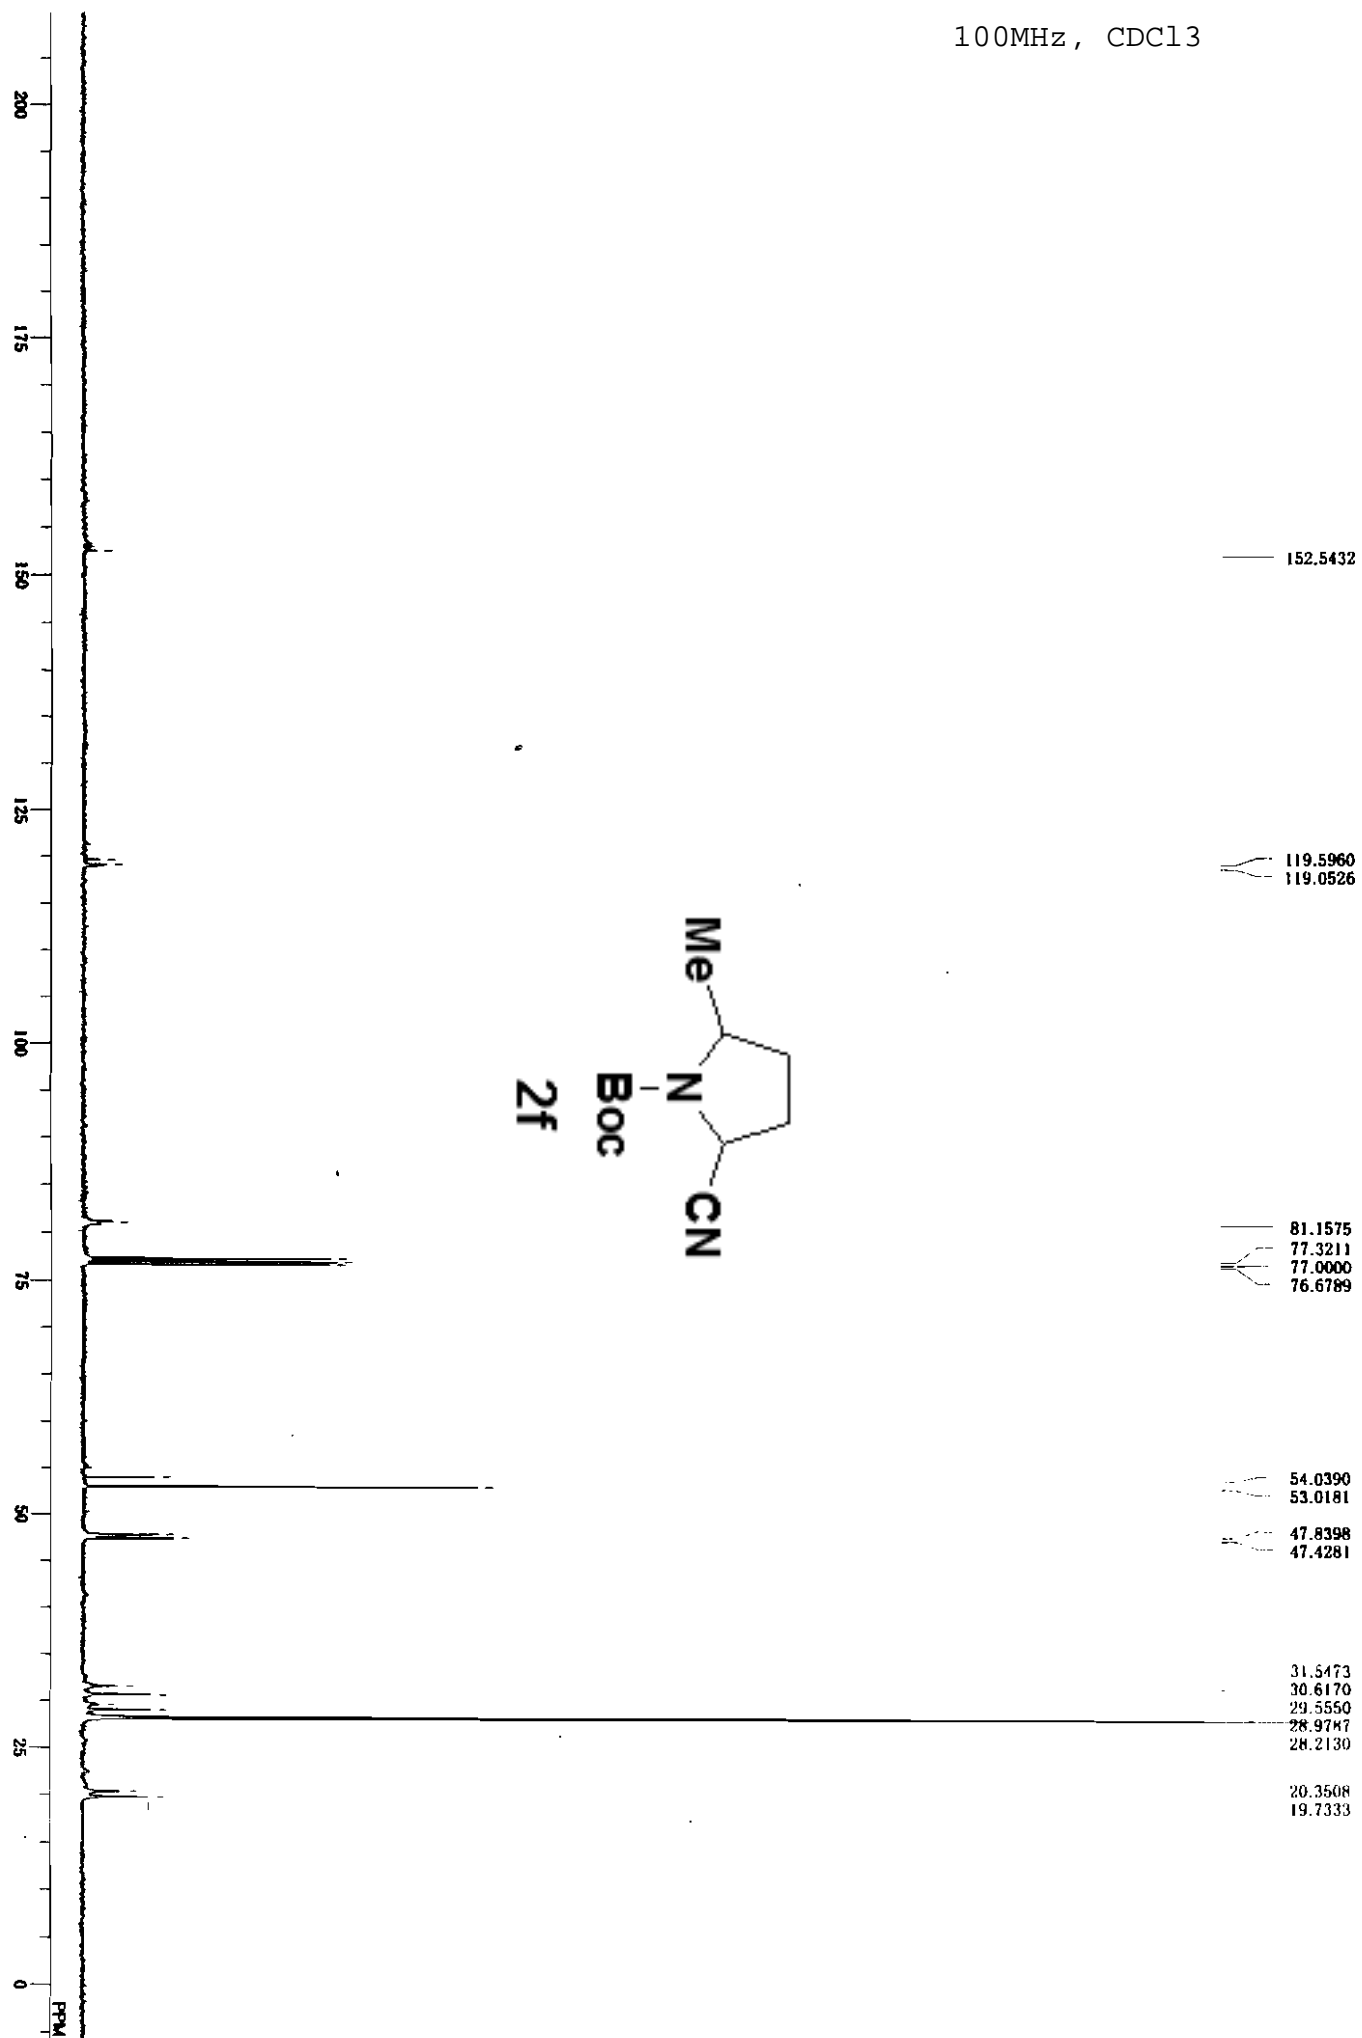





100MHz, CDCl3

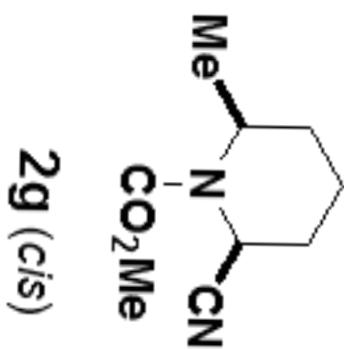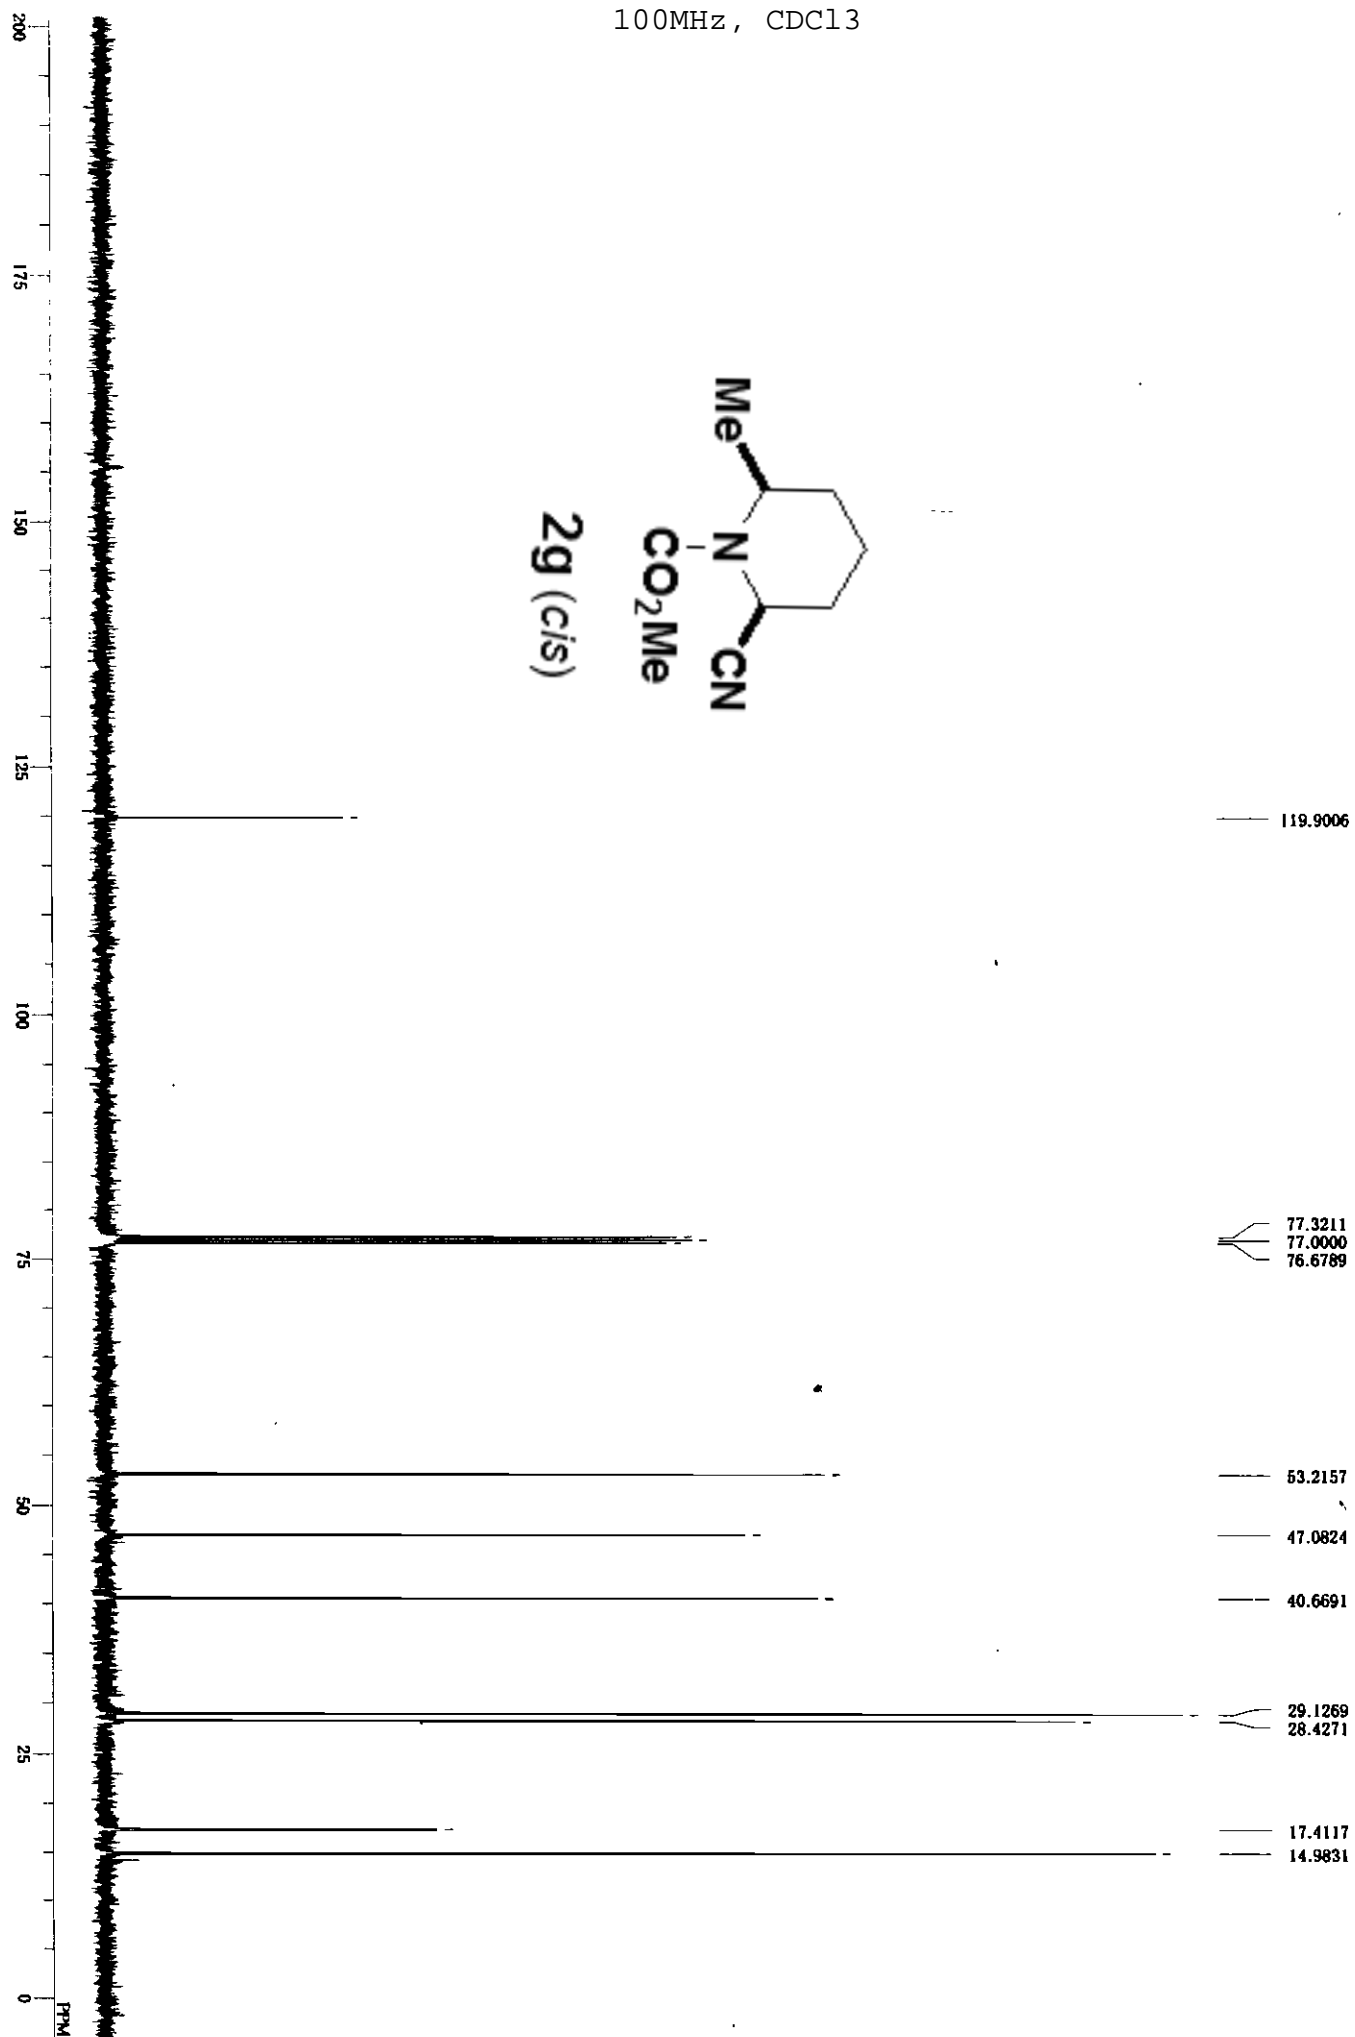

400MHz, CDCl3

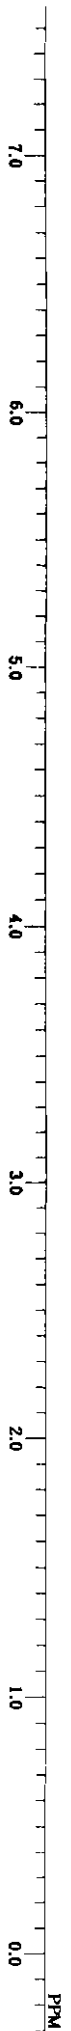

7.2843

5.1746

4.1131

2.0120  
1.9779  
1.8949  
1.8619  
1.7546  
1.7424  
1.7094  
1.6948  
1.6814  
1.5703  
1.5008  
1.4886  
1.4532

0.9566  
0.9383  
0.9200

2h (c/s)

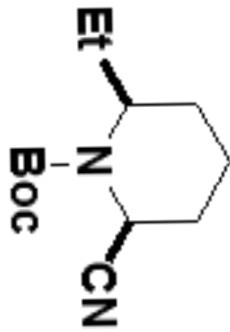

100MHz, CDC13

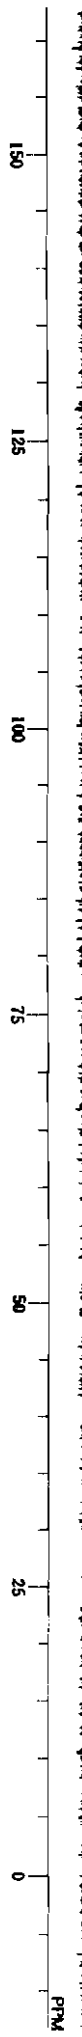

2h (cis)

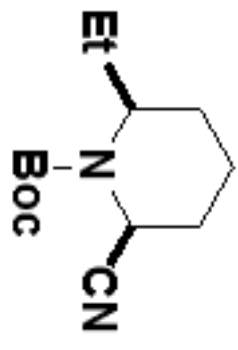

154.5366  
154.3791

119.8841

81.1410  
77.3128  
77.0000  
76.8600  
76.6789

52.7135  
52.6230  
52.5489  
52.4666  
40.7514  
40.6773  
40.5127  
40.4139  
40.3727  
40.3151  
40.2081  
40.1751  
40.0763  
28.8140  
28.7070  
28.5506  
28.4188  
28.3694  
28.1801  
27.0934  
26.8052  
26.6241  
24.5248  
24.3025  
24.0802  
15.3289  
15.1971  
11.4512  
11.3360

500MHz, CDCl3

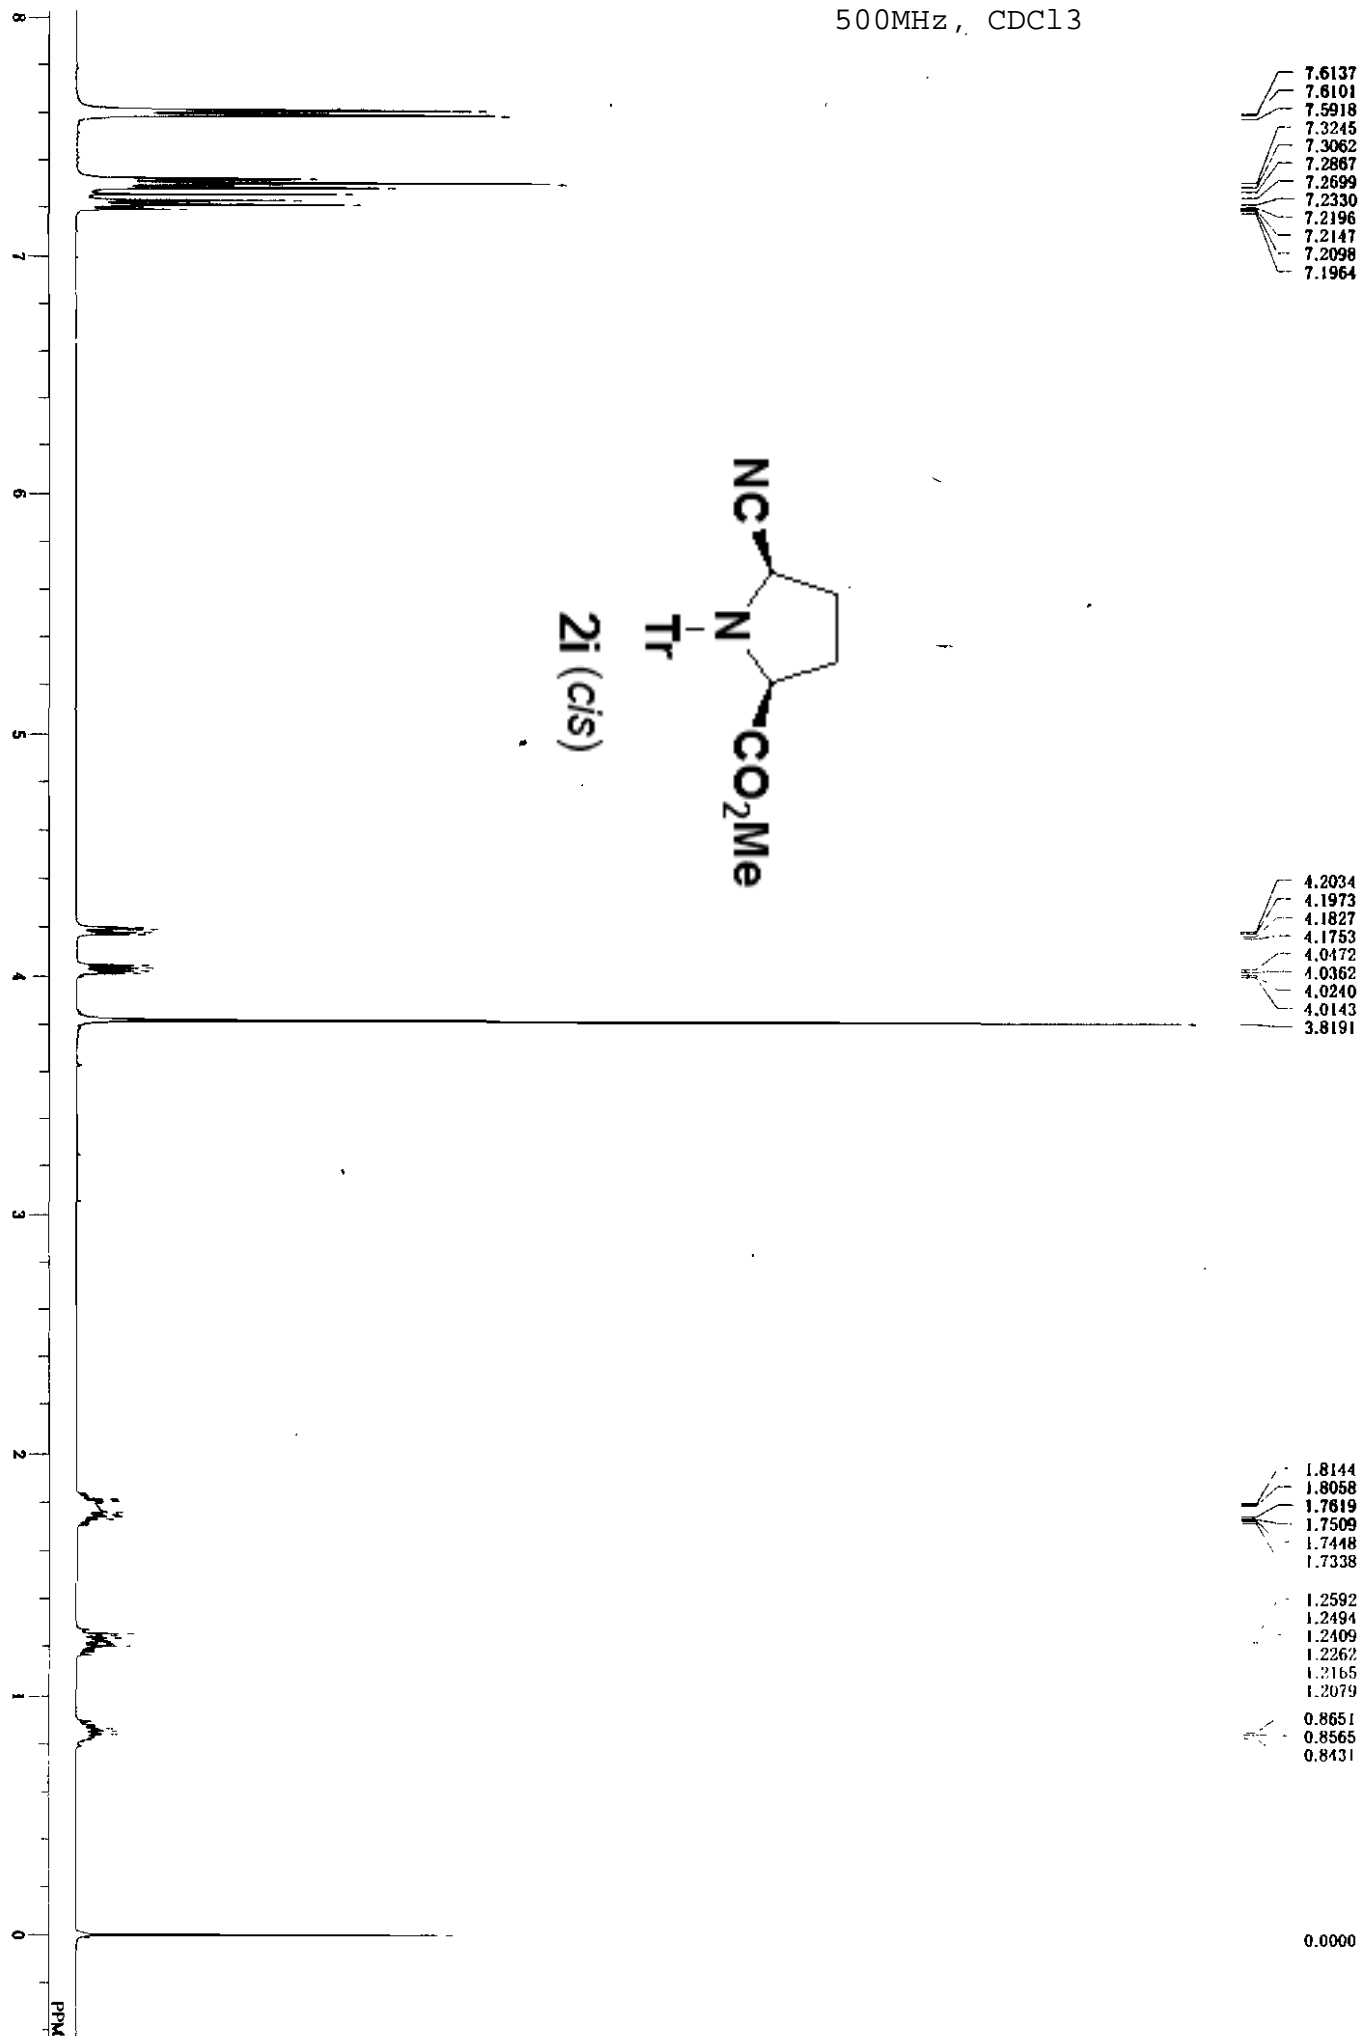

100MHz, CDCl3

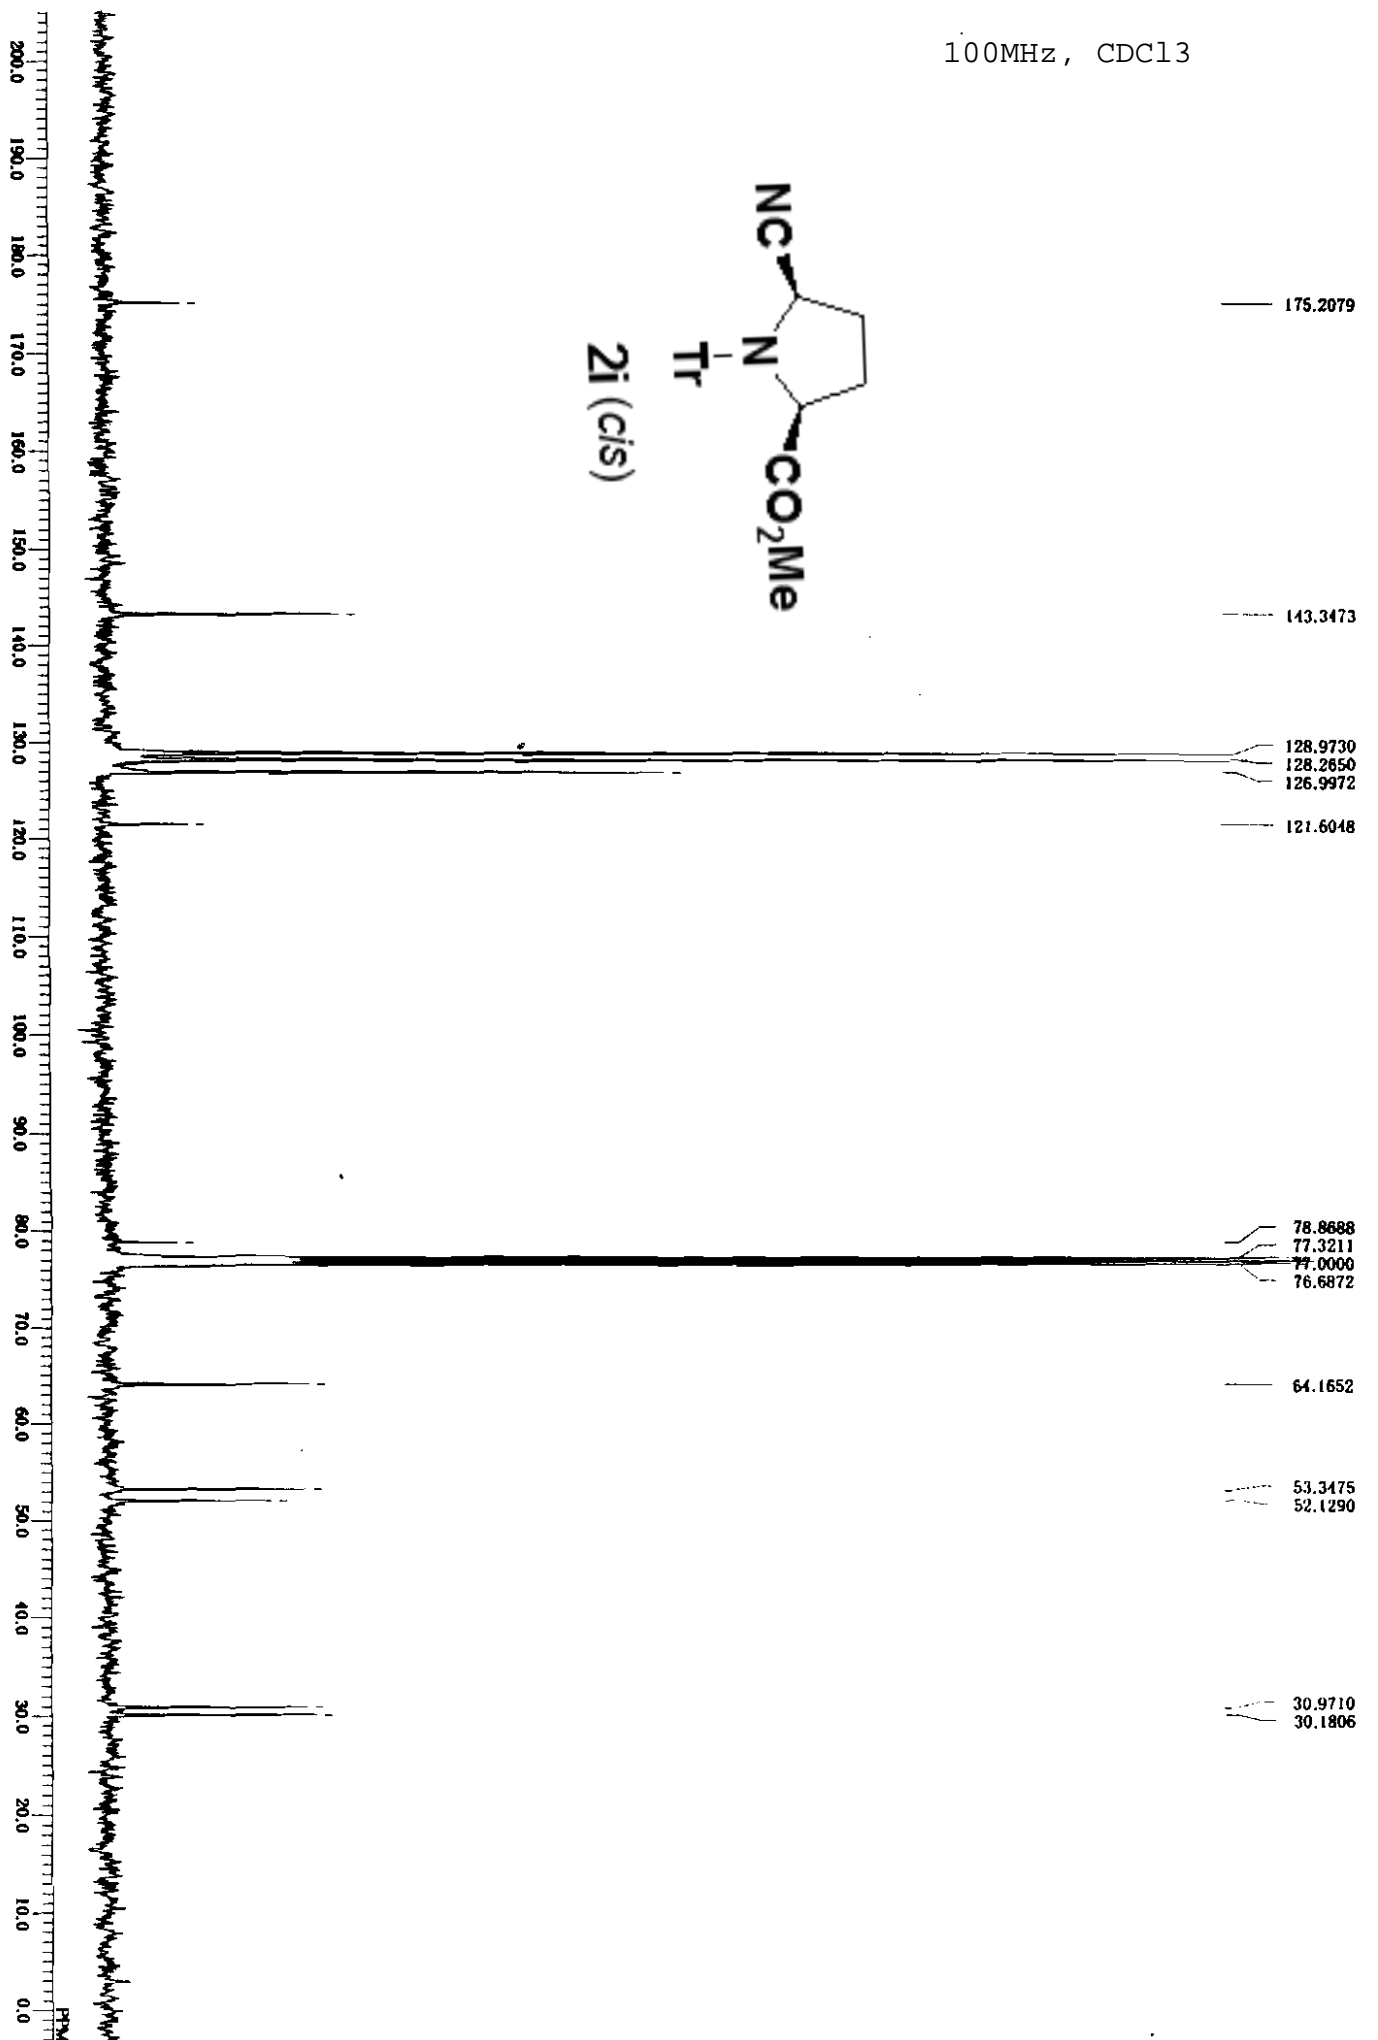

400MHz, CDCl3

7.6296  
7.6101  
7.4429  
7.4246  
7.3172  
7.2989  
7.2794  
7.2574  
7.2440  
7.2257  
7.2086  
7.1891

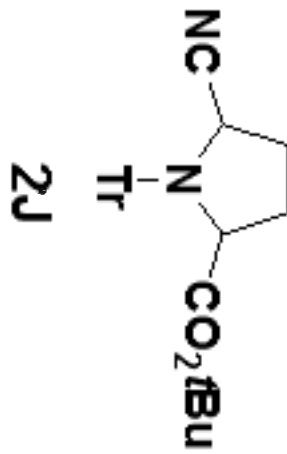

4.1534  
4.1473  
4.1326  
4.1241  
3.9289  
3.9179  
3.9057  
3.8959

1.7460  
1.7411  
1.7265  
1.7082  
1.5911  
1.5703  
1.4935

1.2299  
1.2153  
1.2104

0.8126  
0.7980

0.0000

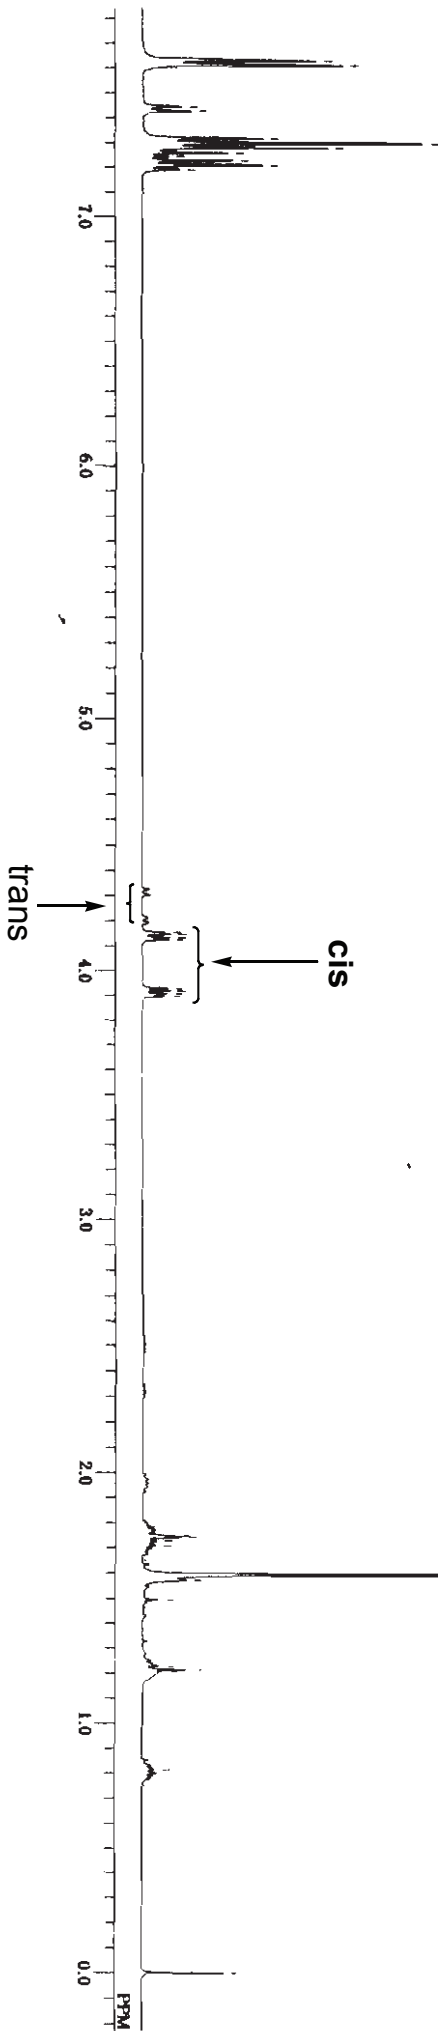

100MHz, CDCl3

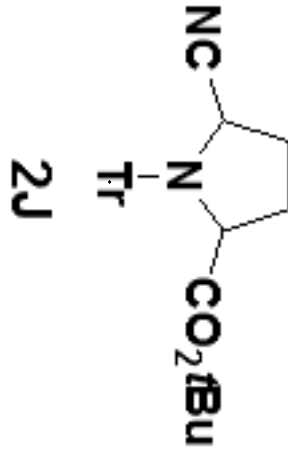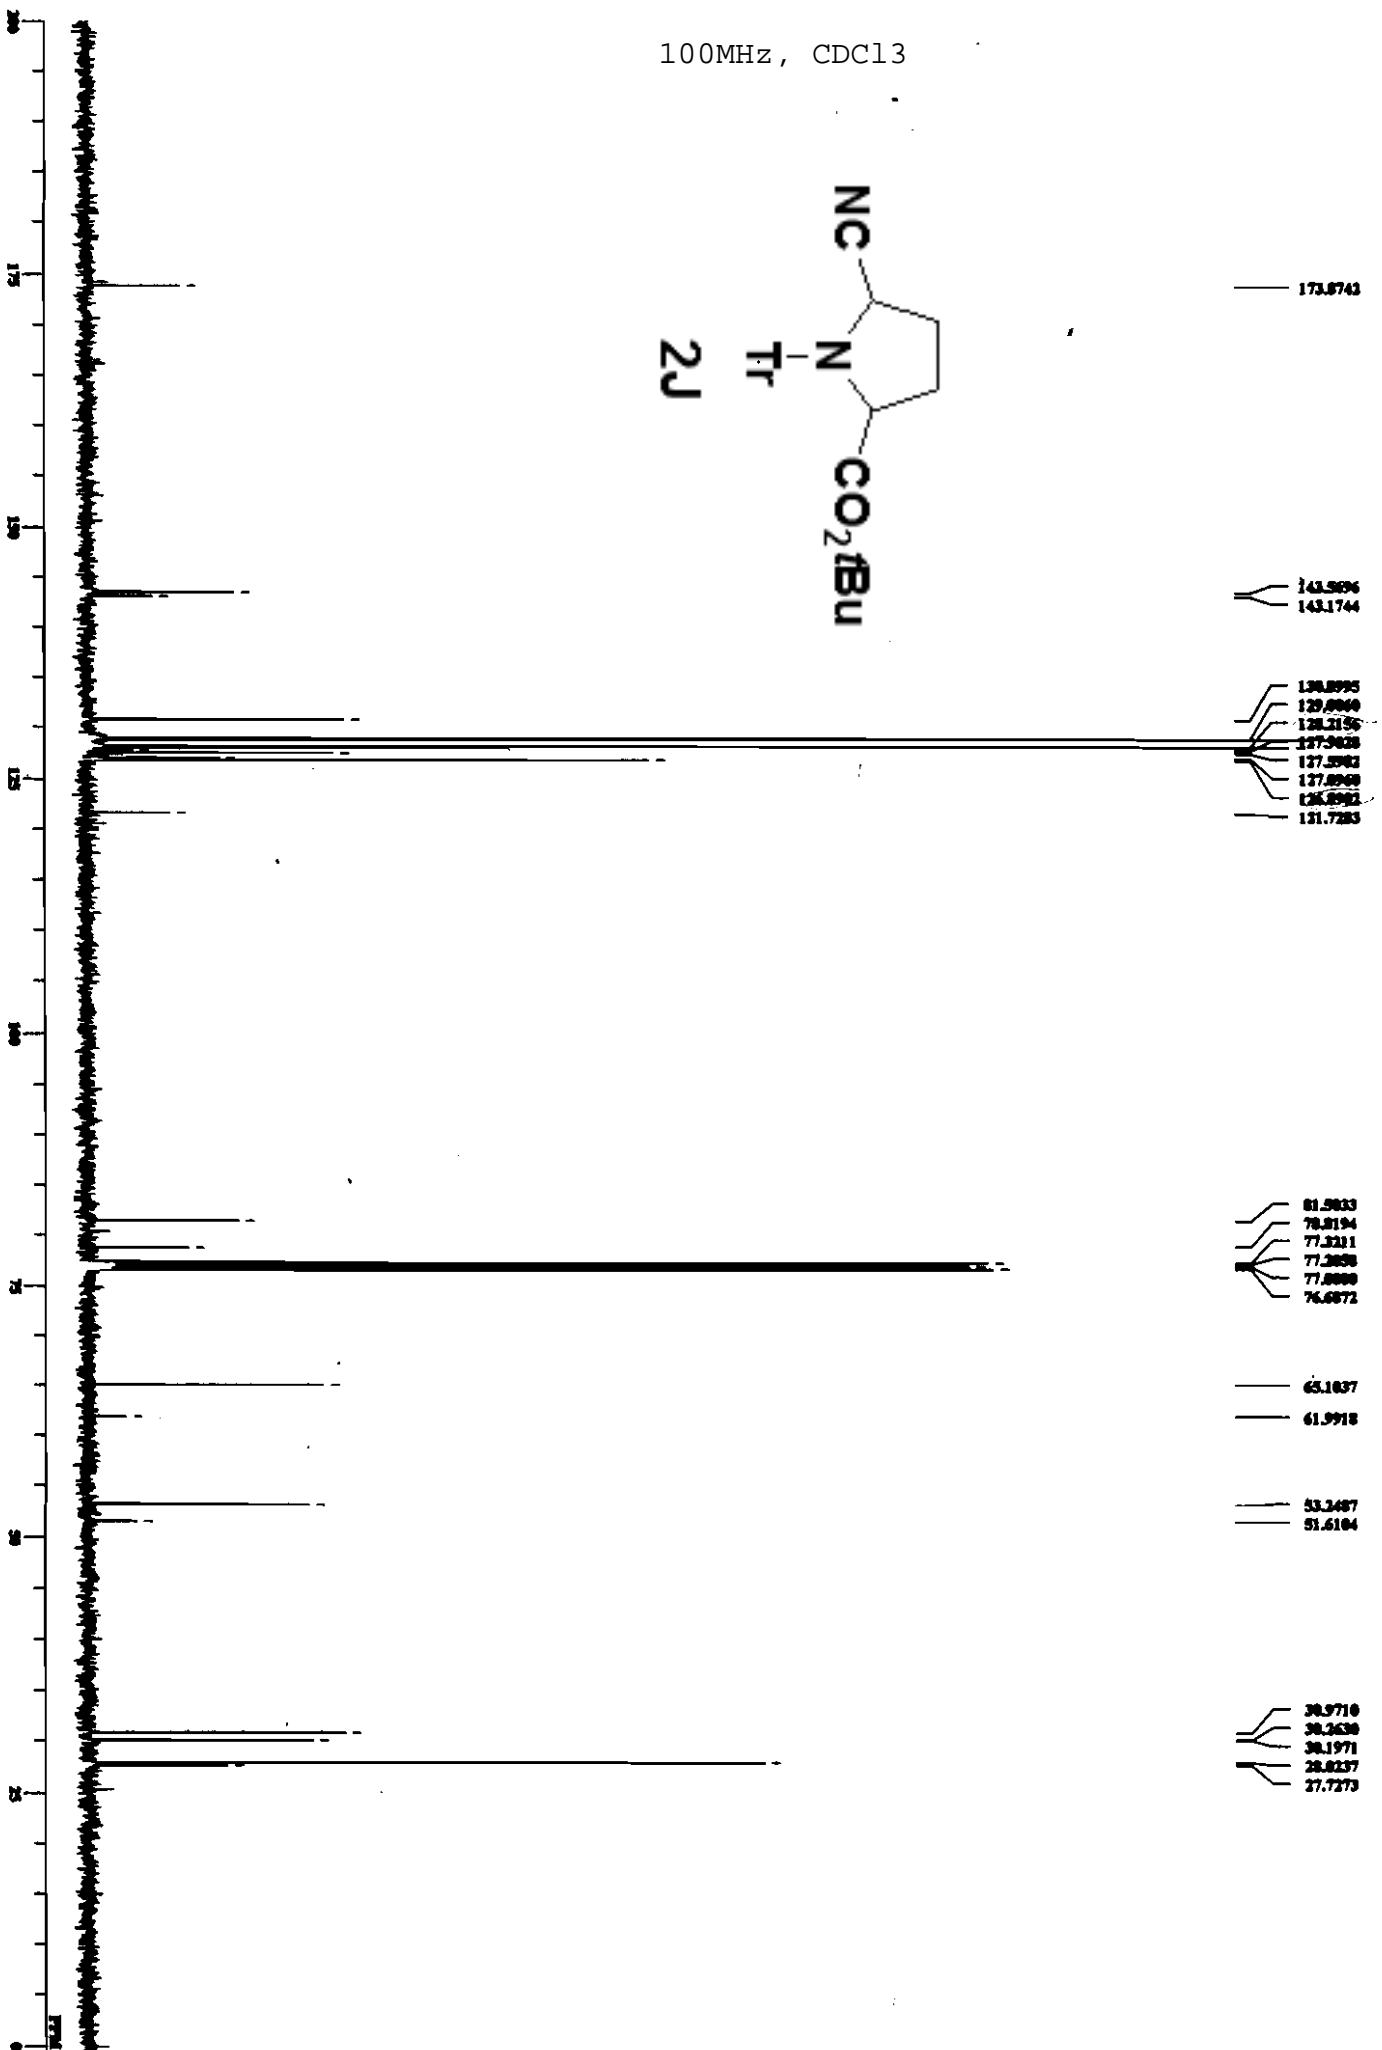

500MHz, CDCl<sub>3</sub>

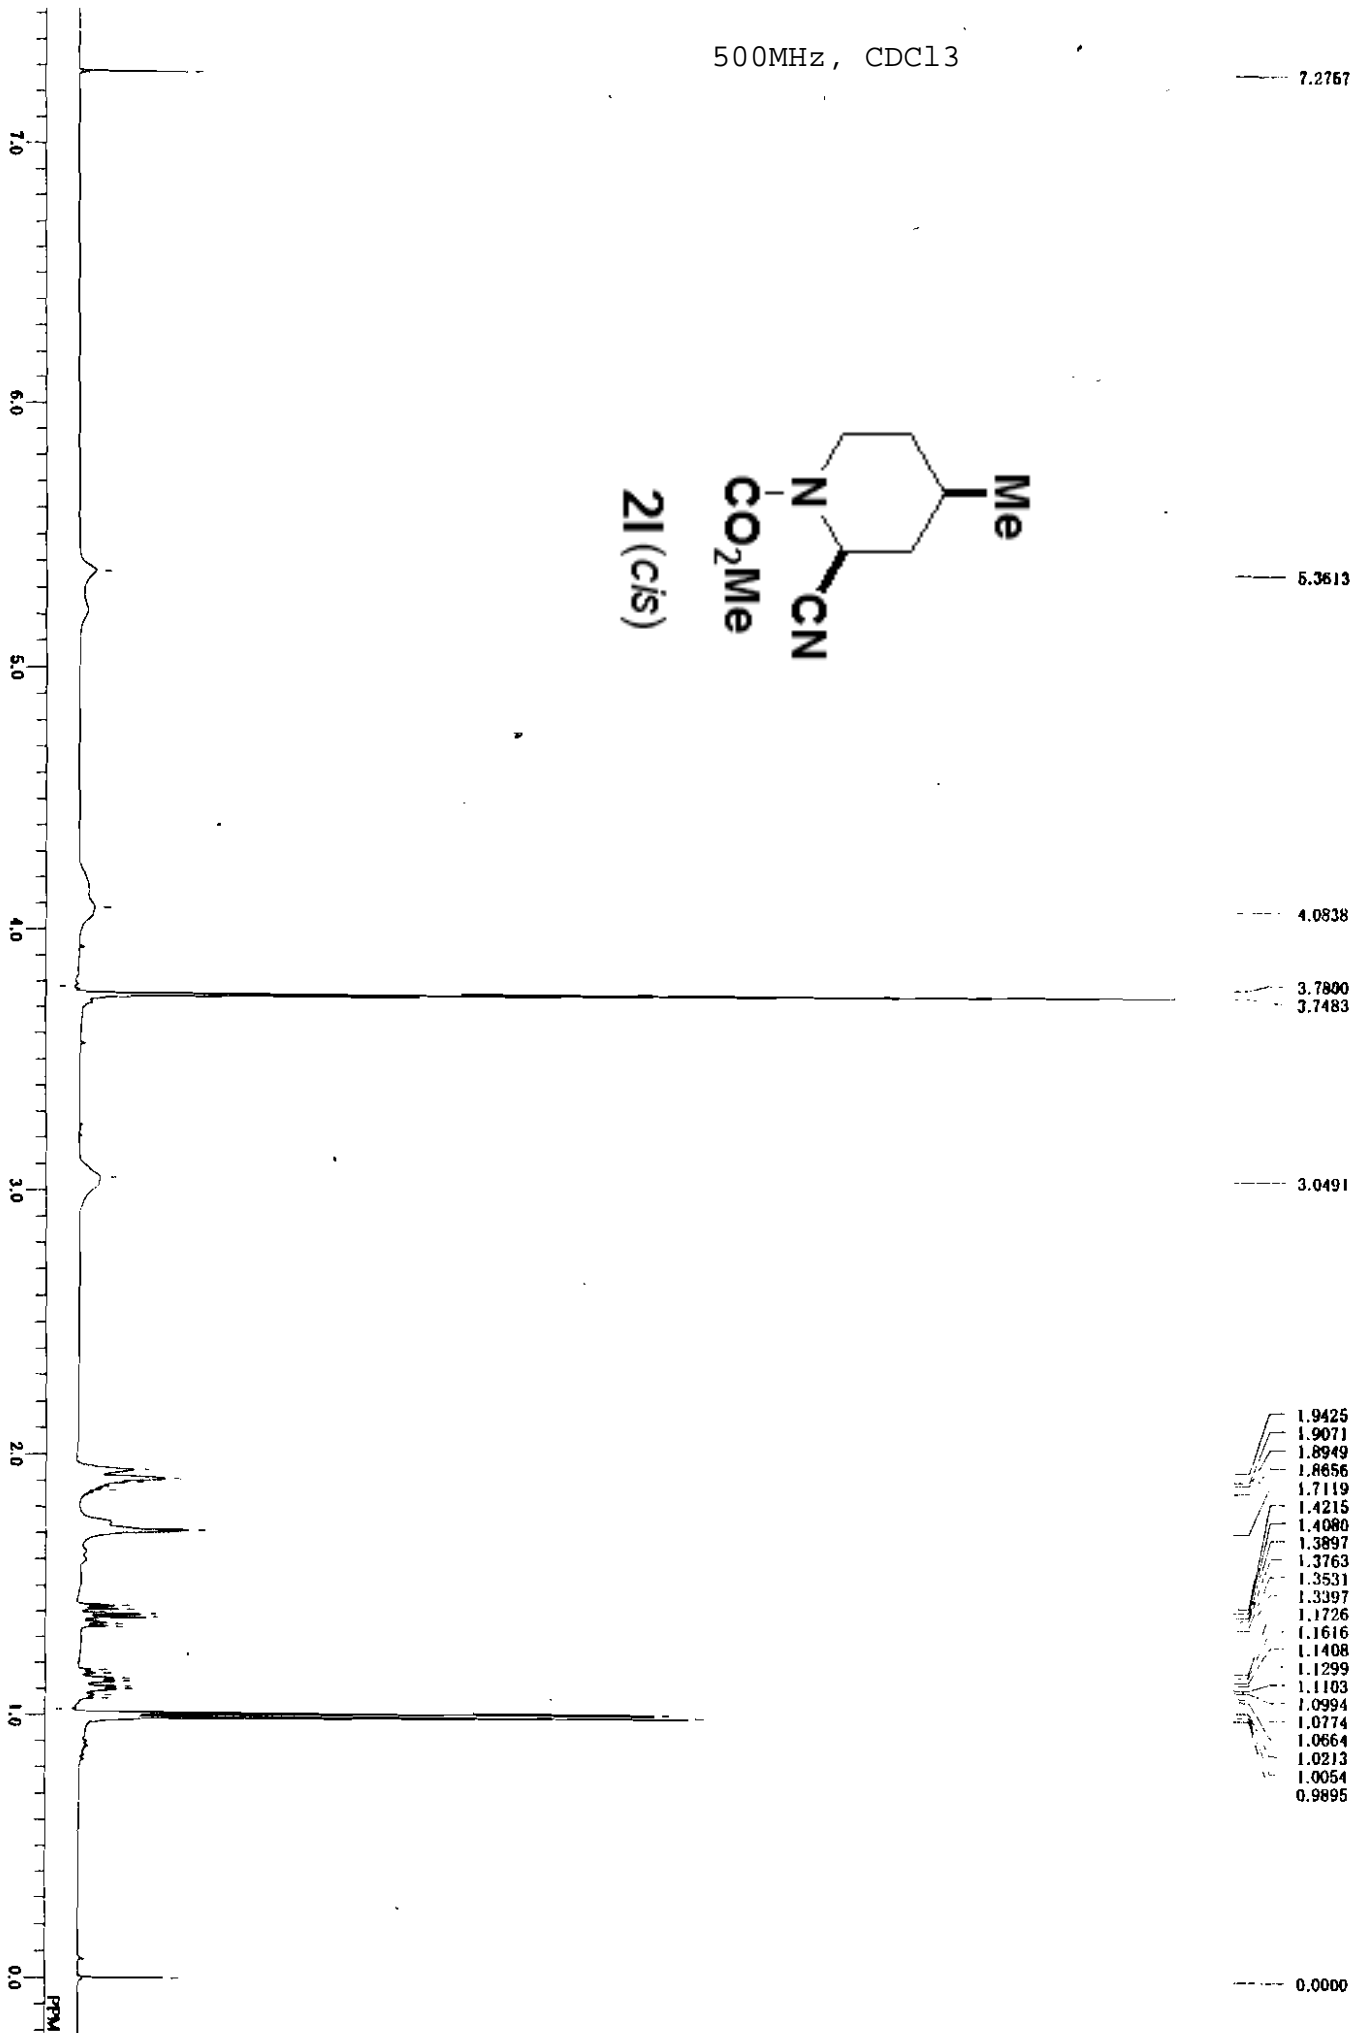



100MHz, CDCl3

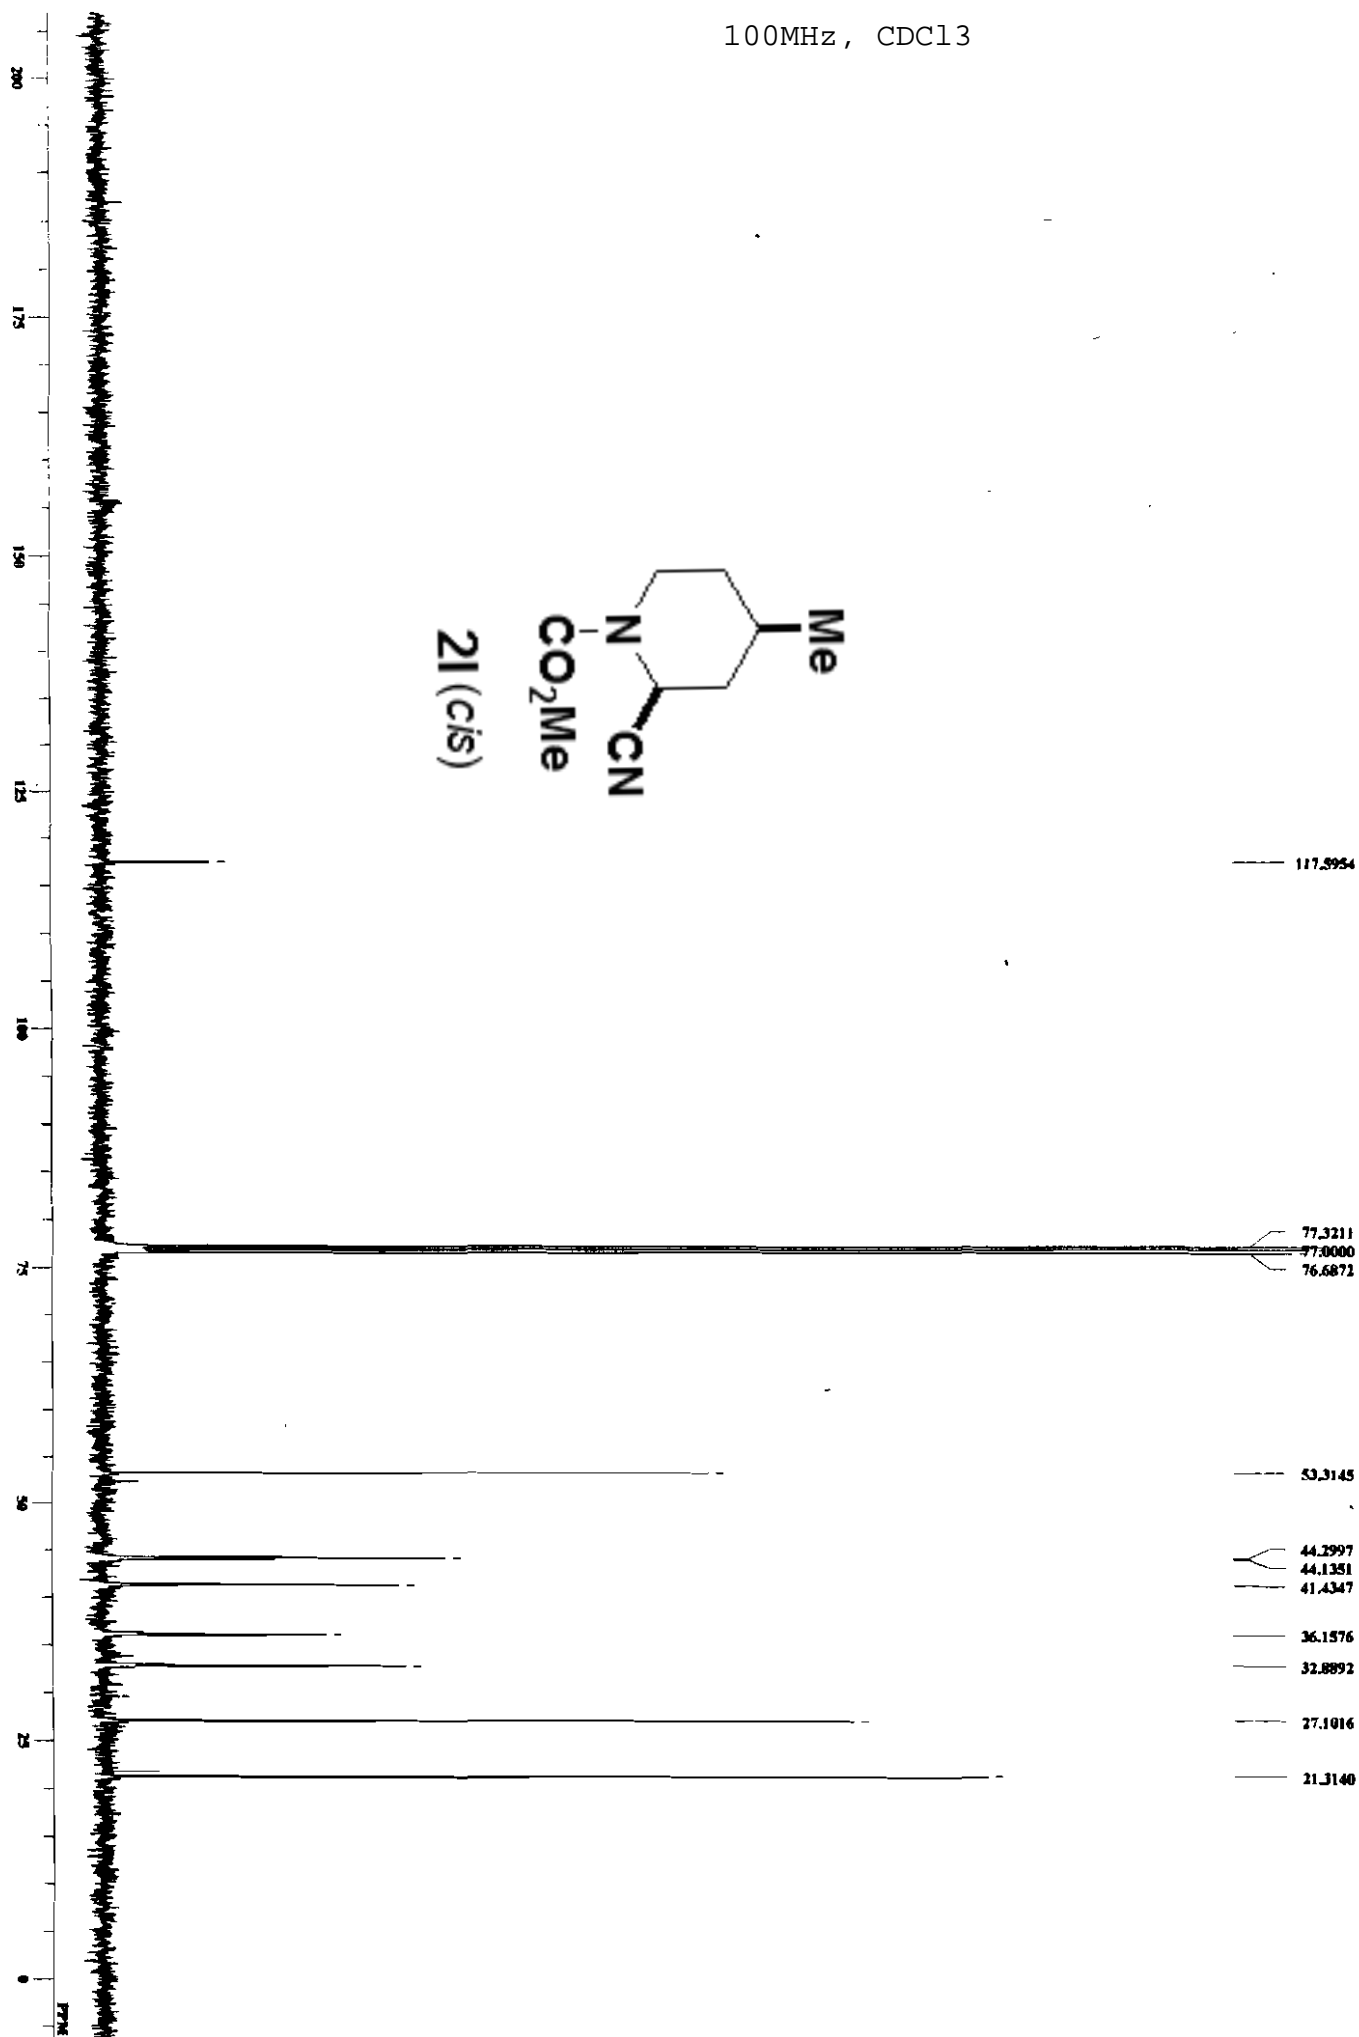

500MHz, CDCl<sub>3</sub>

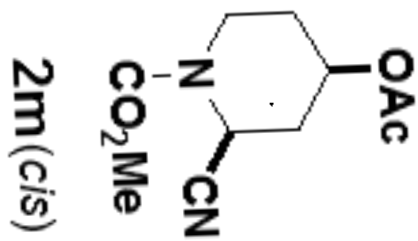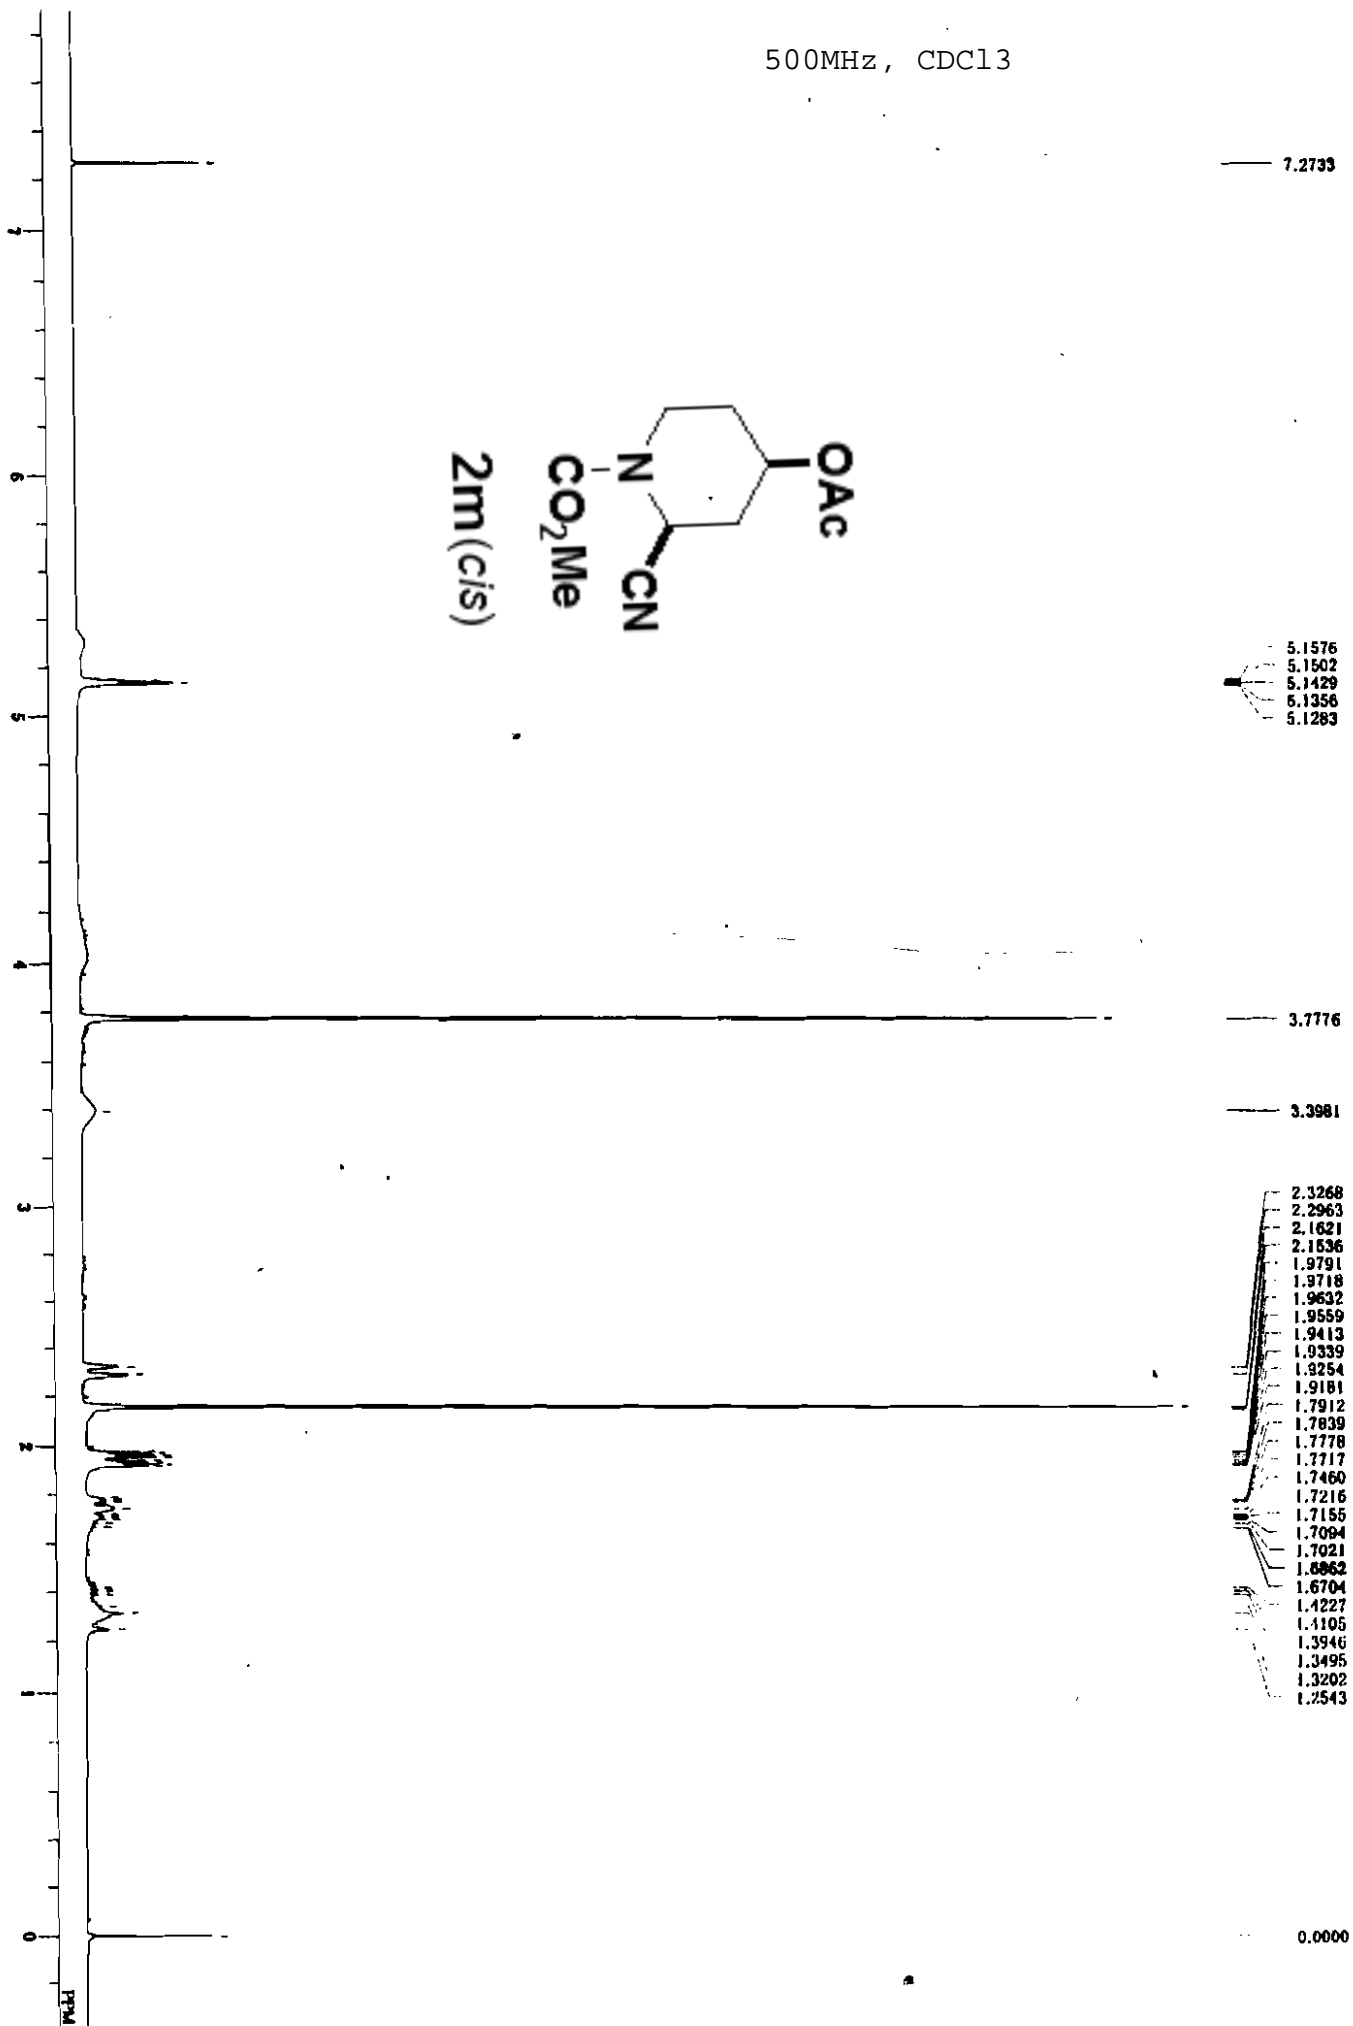

500MHz, CDCl3

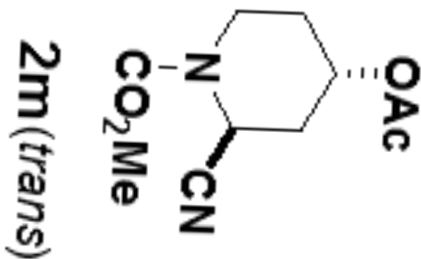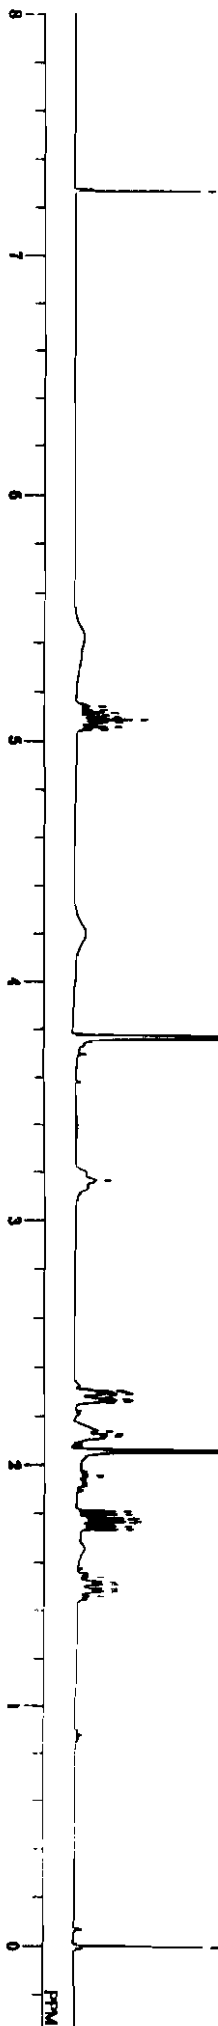

7.2721

5.1429  
5.1271  
5.1161  
5.1051  
5.0990  
5.0880  
5.0770  
5.0687  
5.0477

3.7764  
3.7690

3.1699  
2.3061  
2.3012  
2.2951  
2.2902  
2.2792  
2.2731  
2.2683  
2.2622  
2.2573  
2.1414  
2.1379  
2.1206  
2.0620  
1.9632  
1.9559  
1.8144  
1.8009  
1.7851  
1.7828  
1.7717  
1.7680  
1.7521  
1.7387  
1.5410  
1.5215  
1.5093  
1.4922  
1.4800  
1.4605

0.0000

100MHz, CDCl3

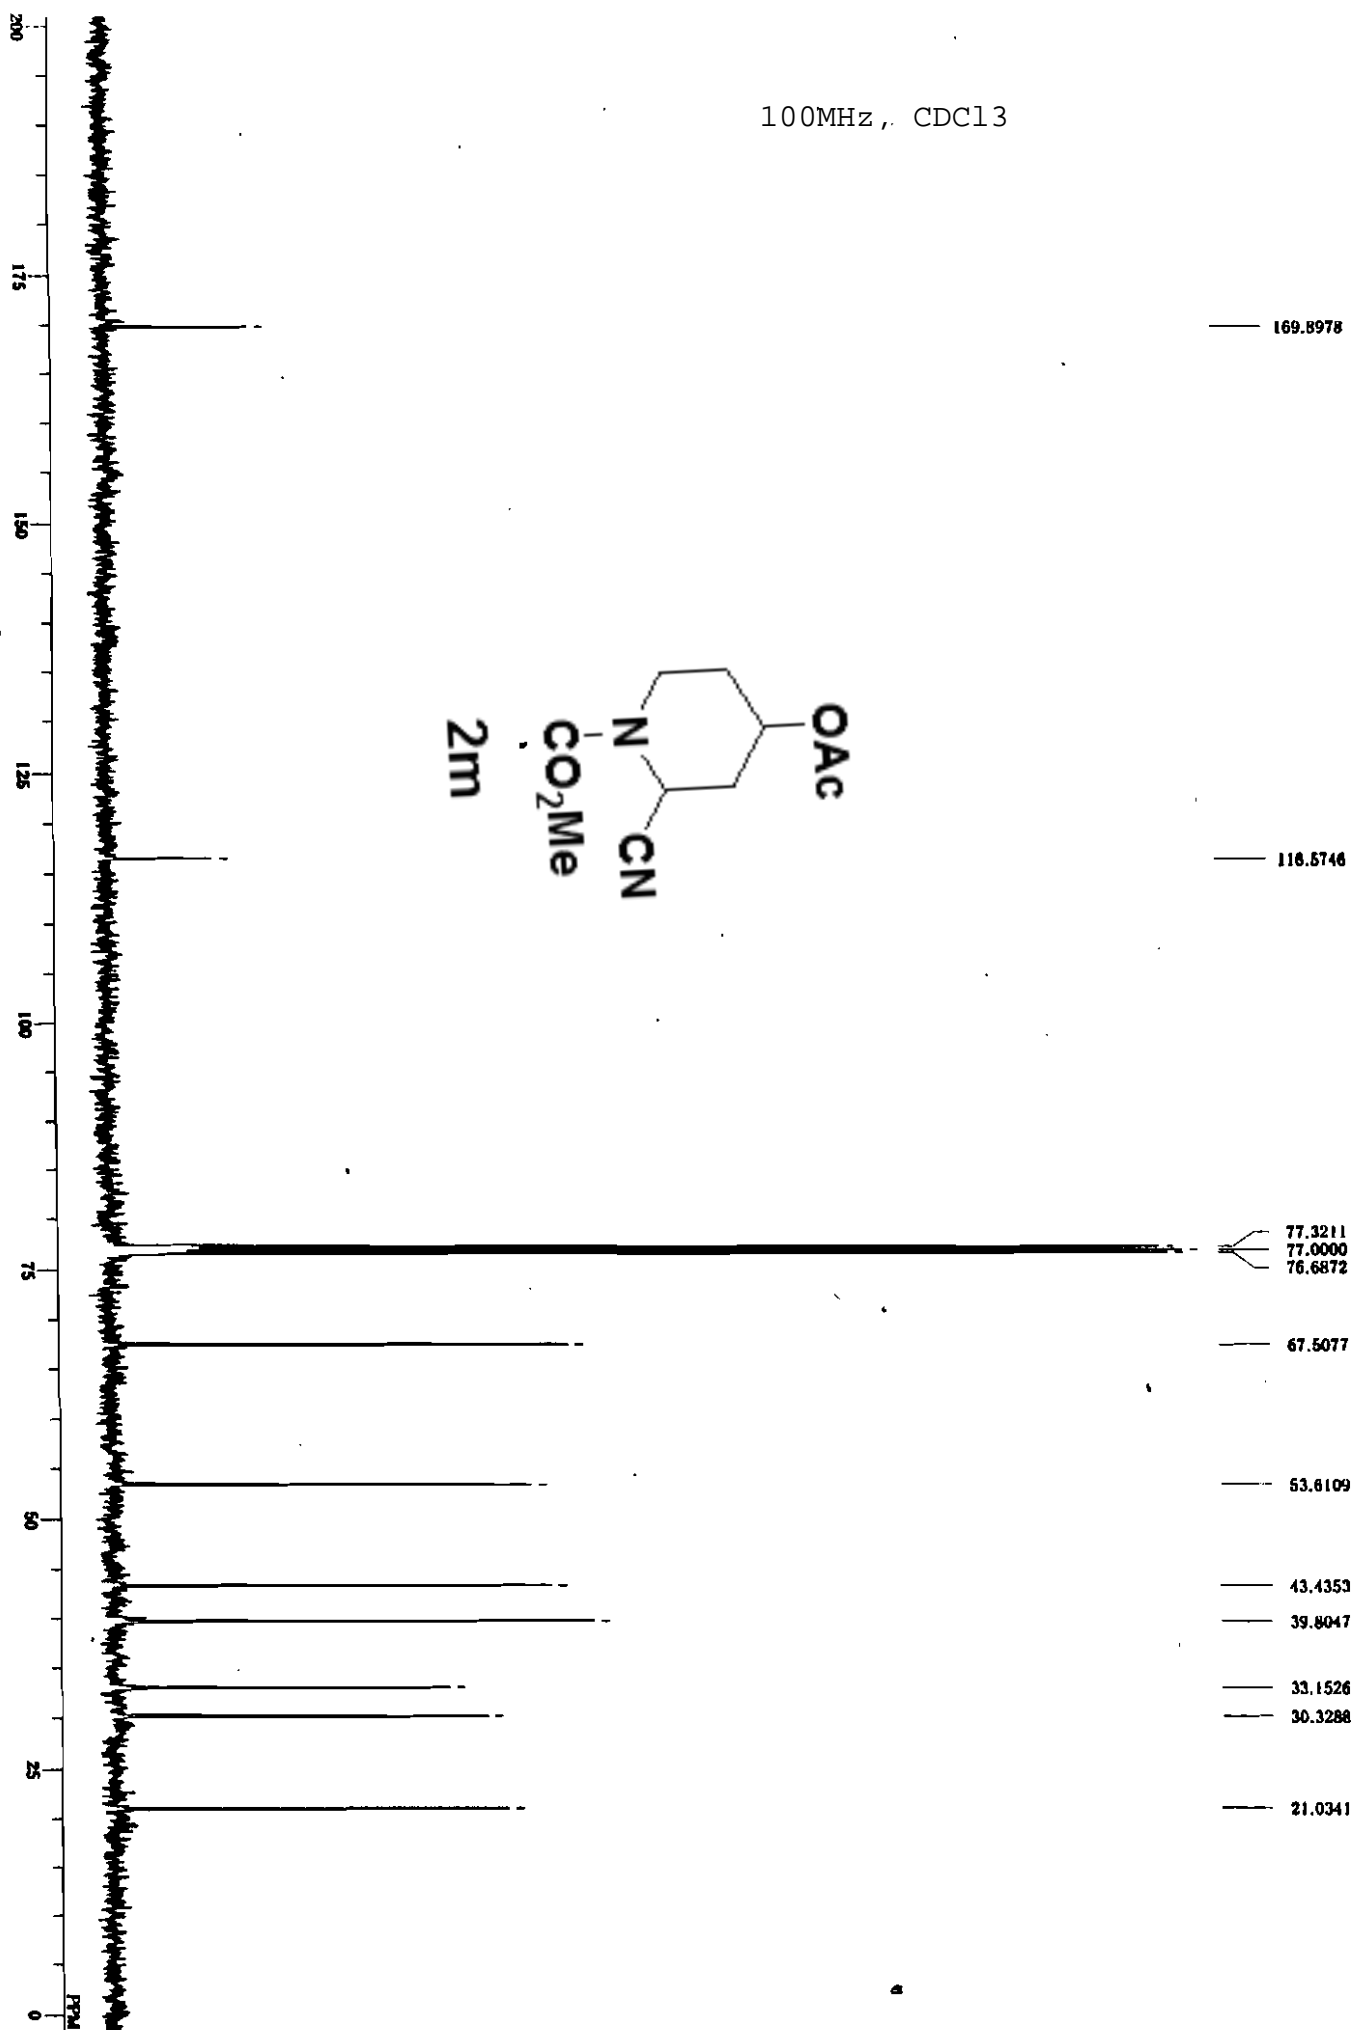

300MHz, CDCl3

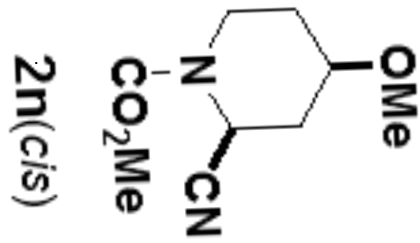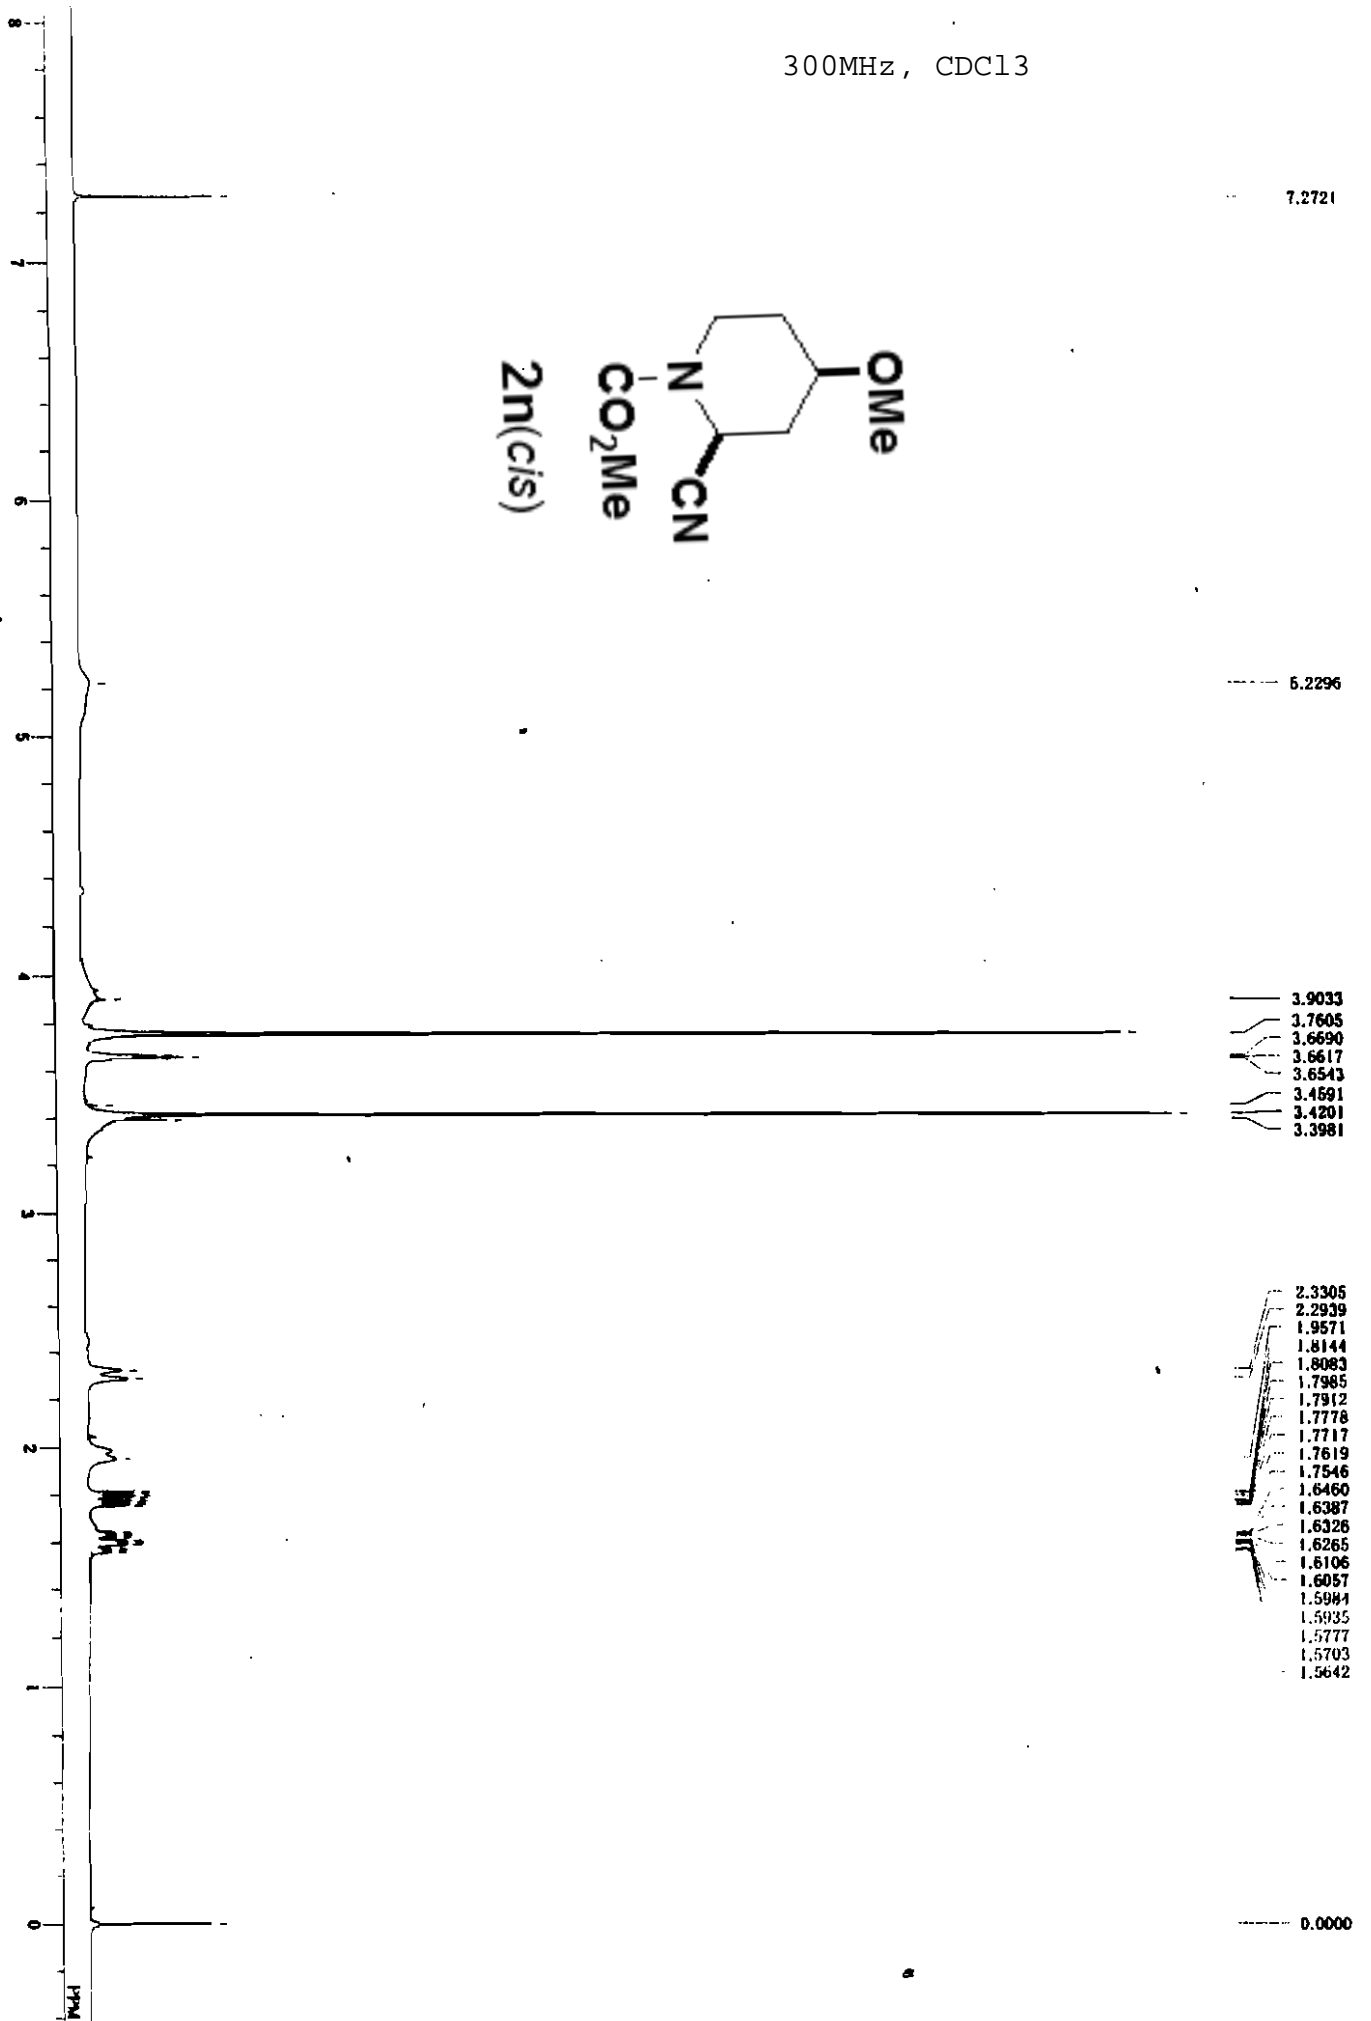

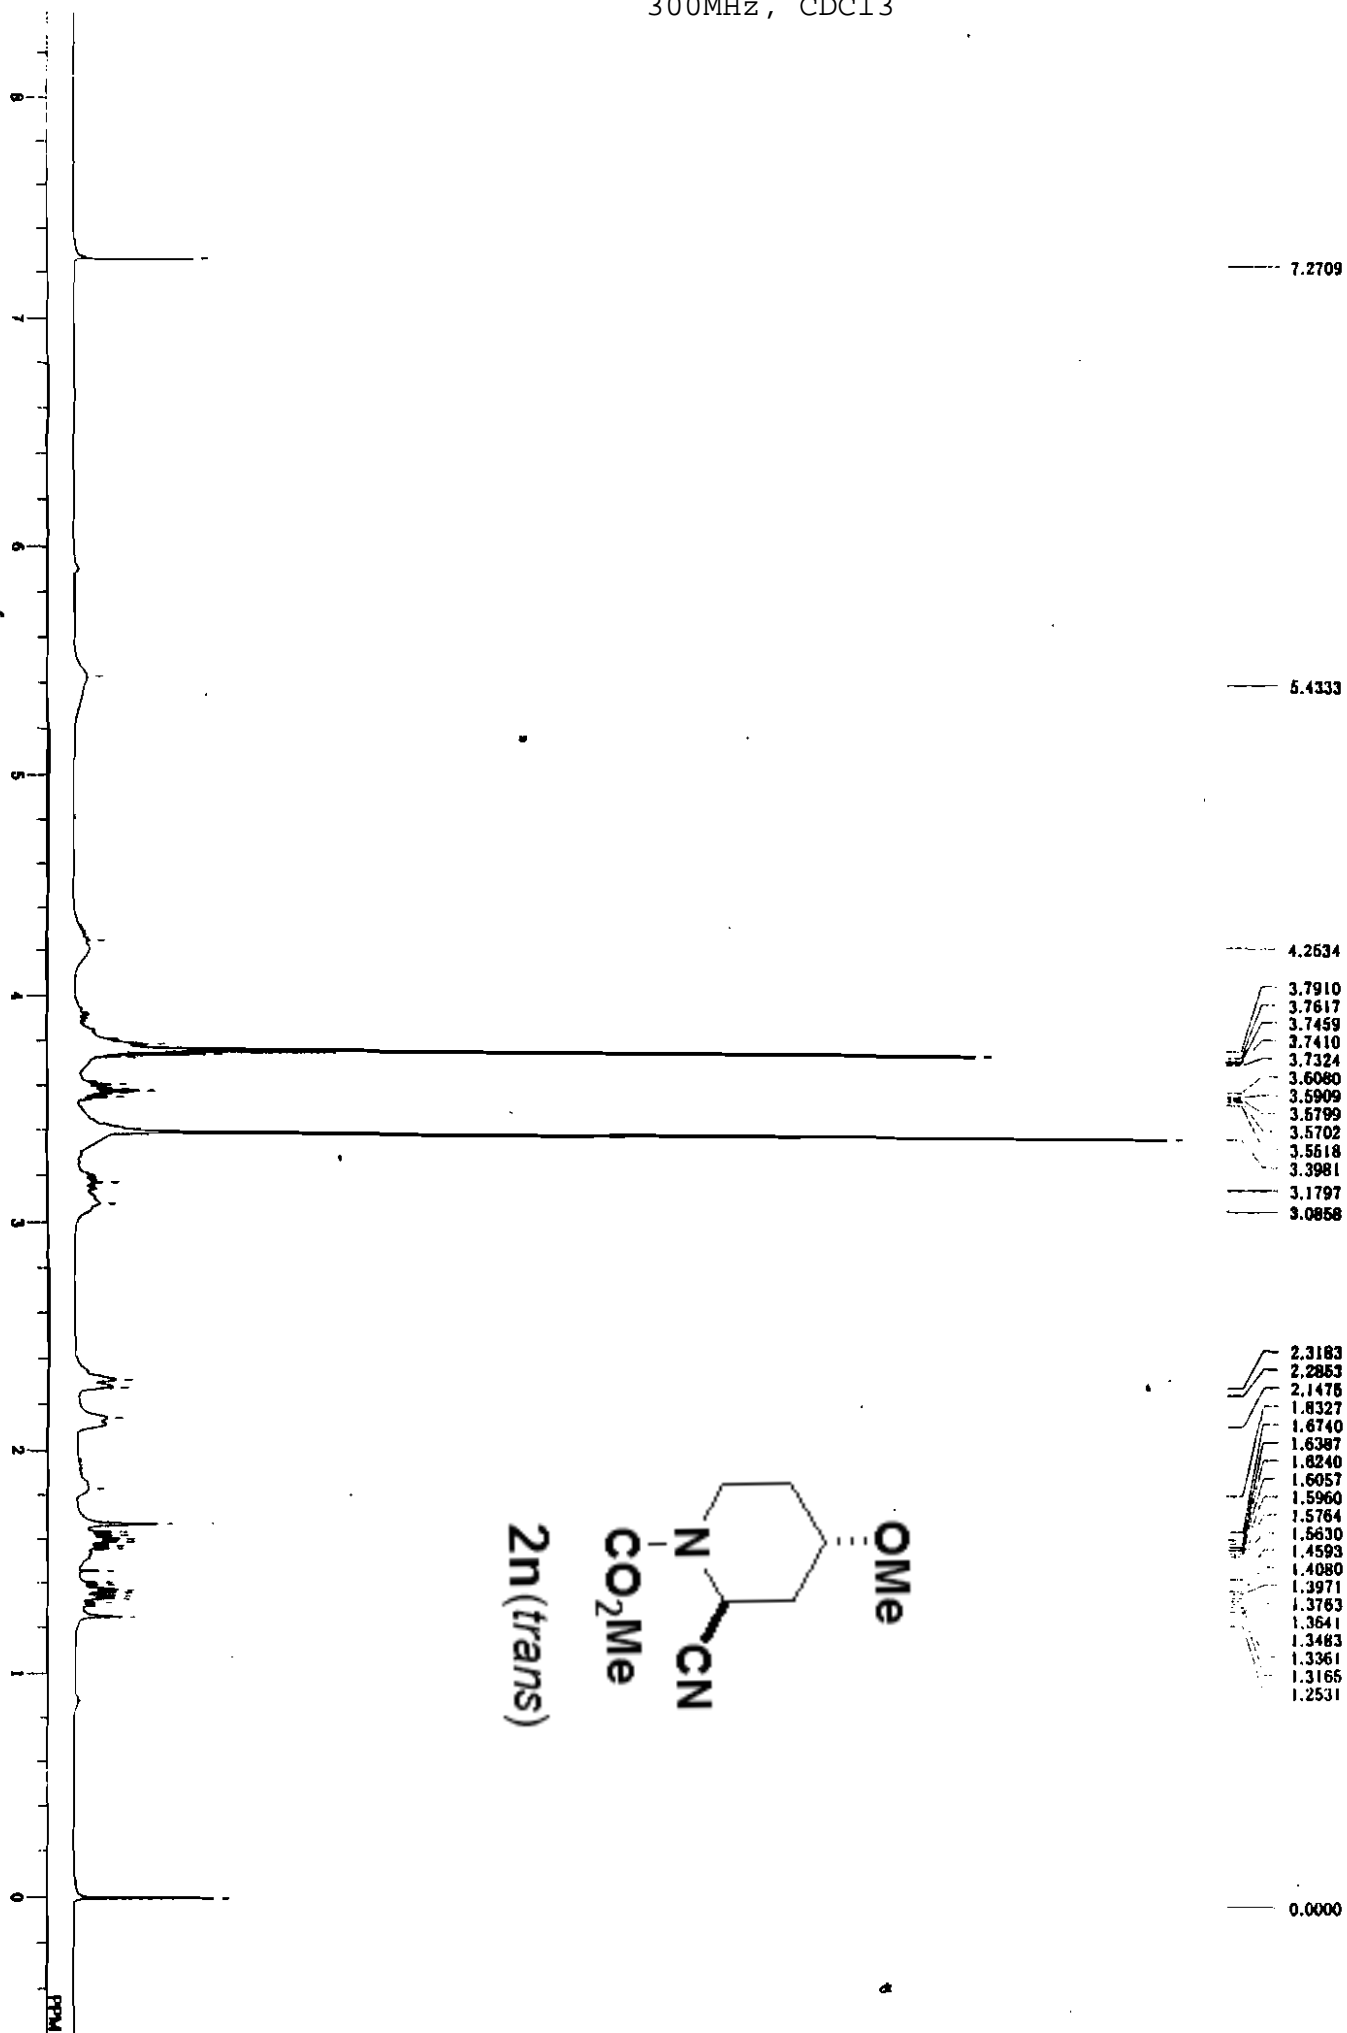

100MHz, CDCl3

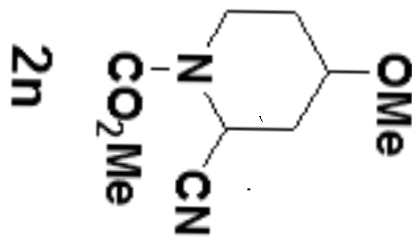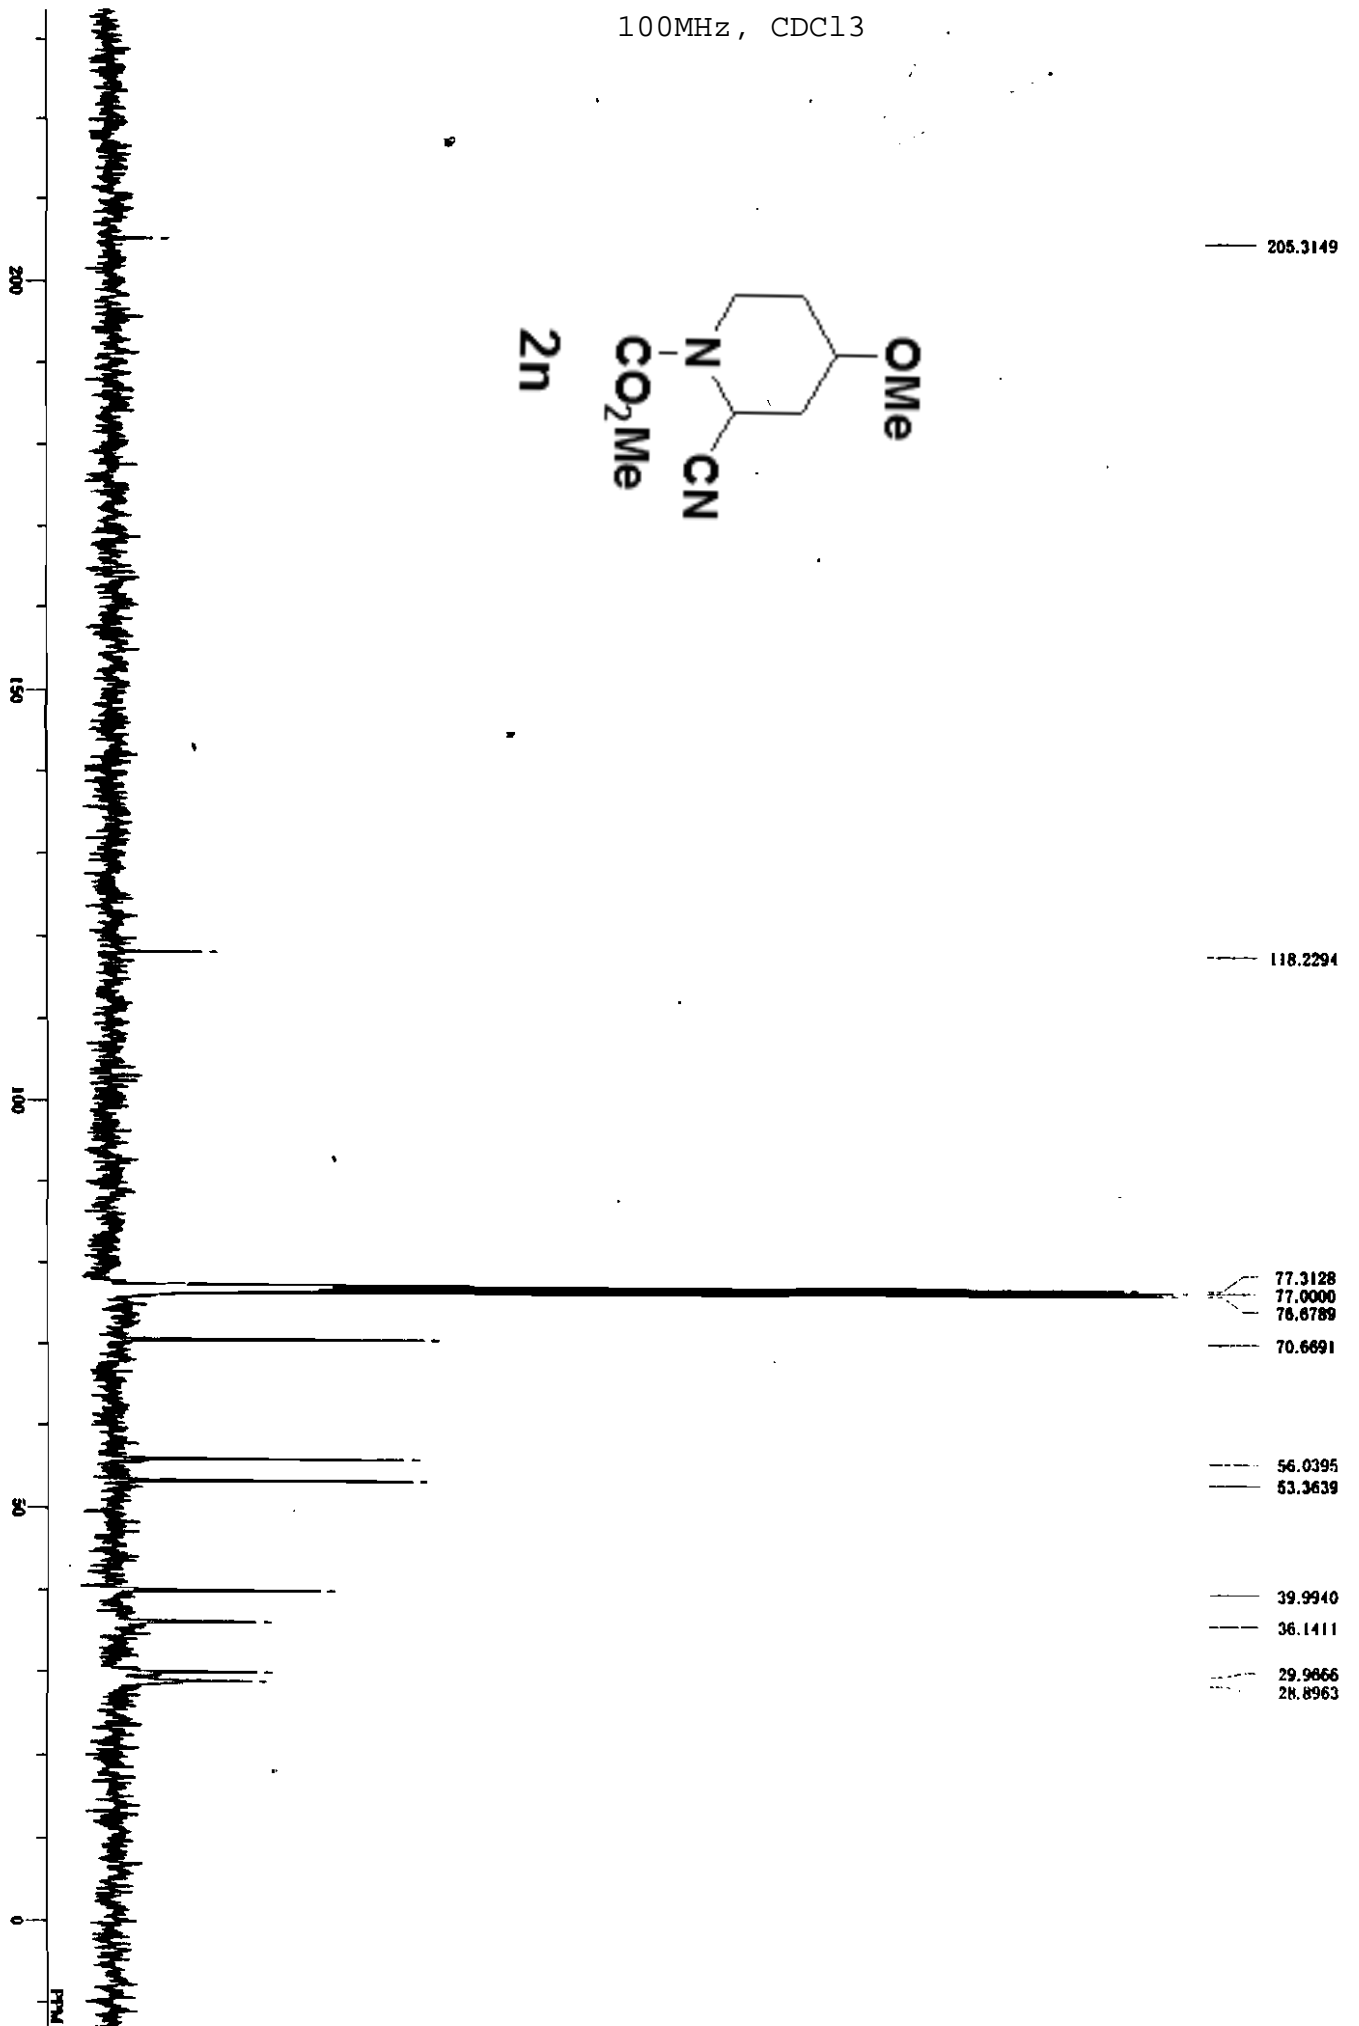

400MHz, CDCl<sub>3</sub>

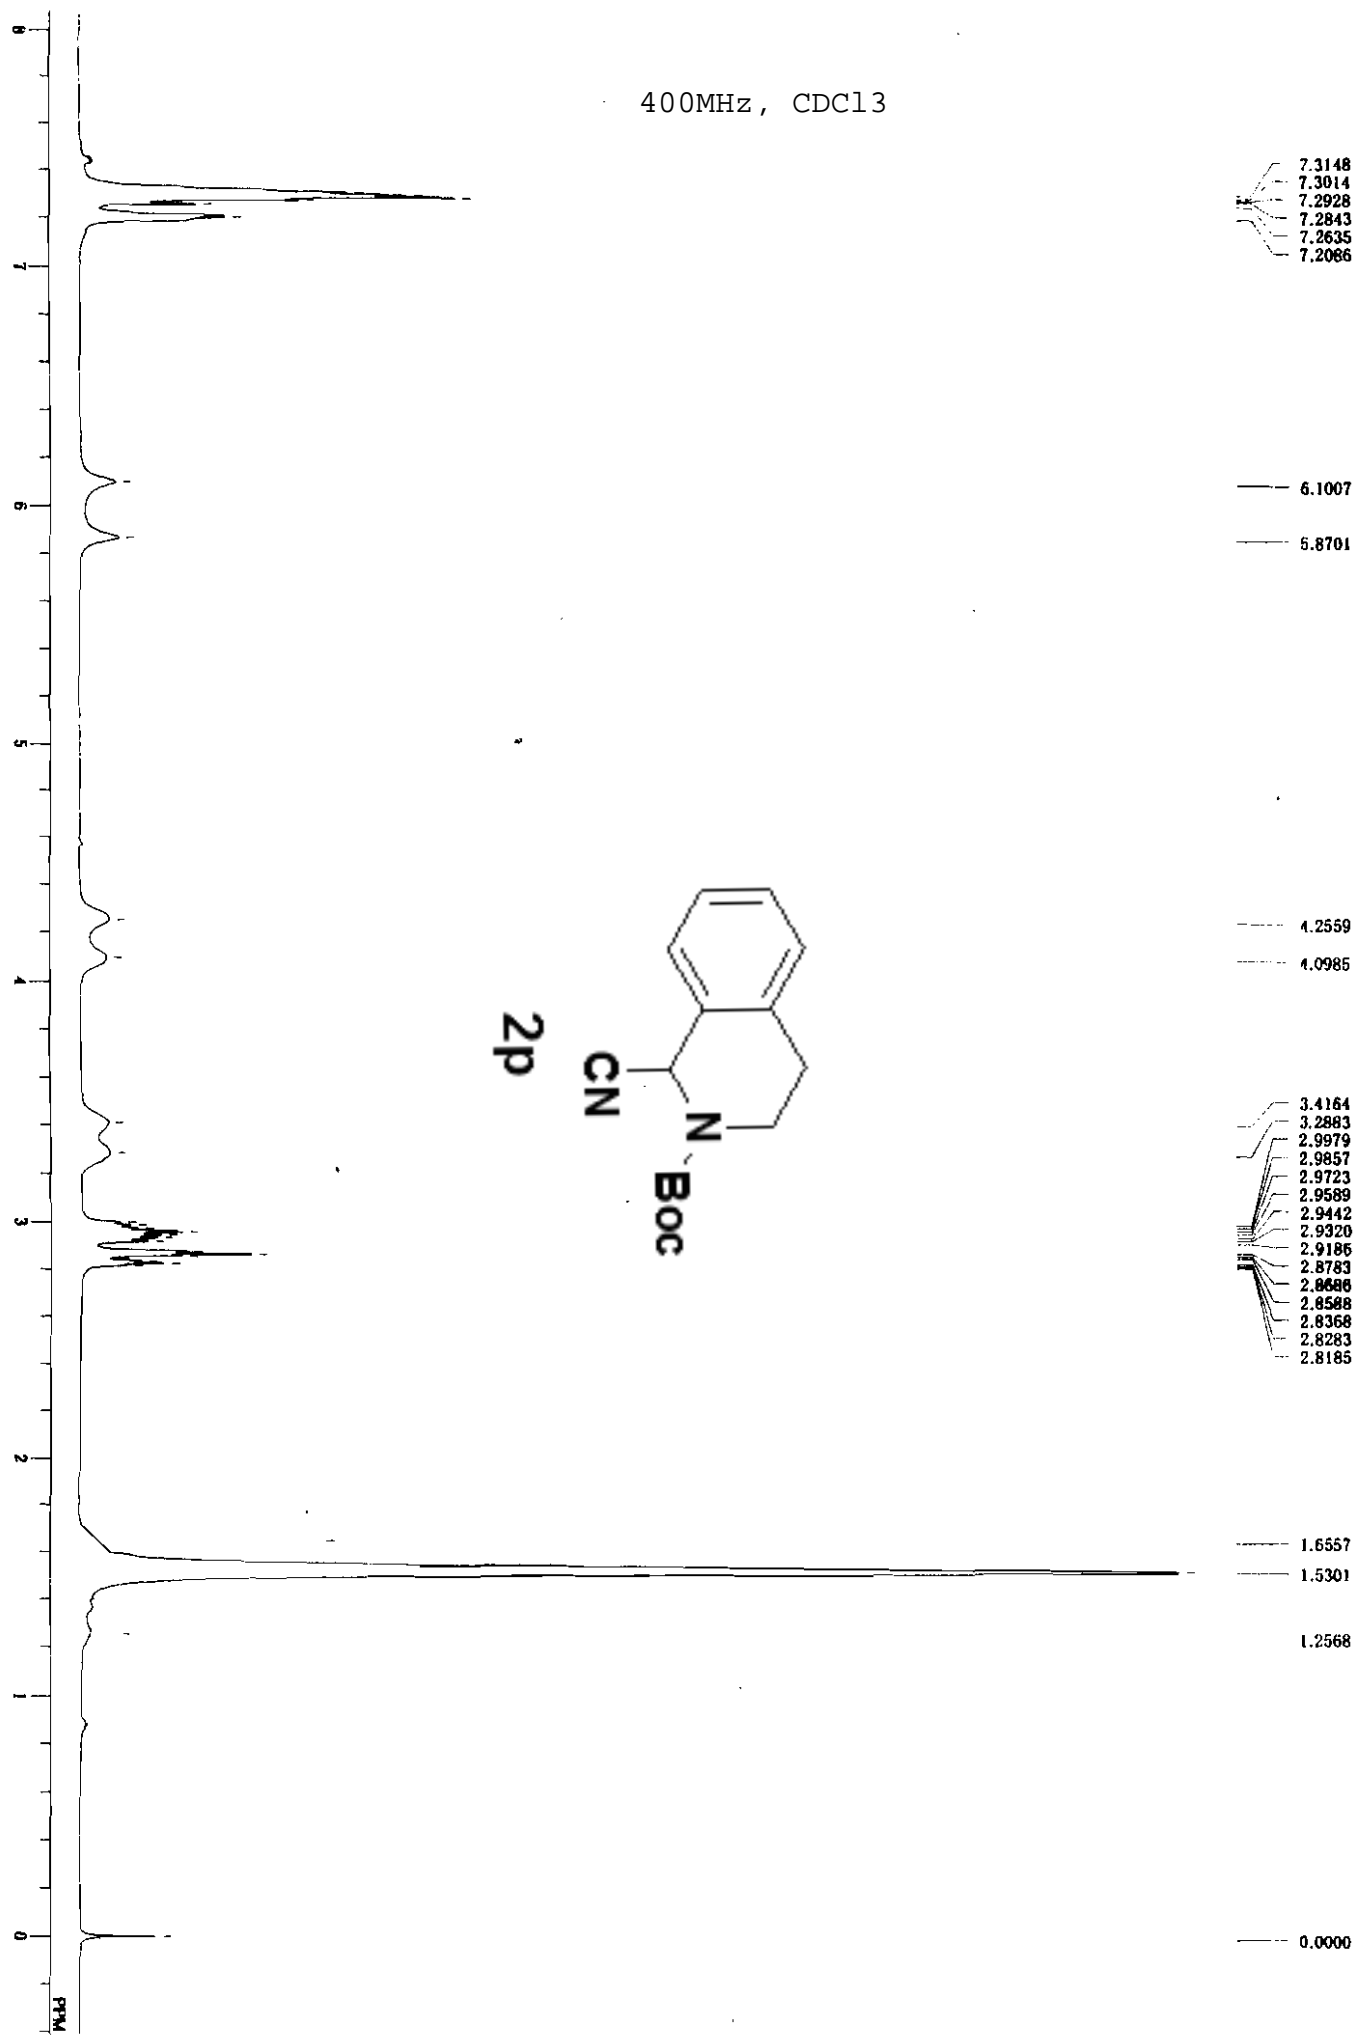



100MHz, CDCl3

150  
125  
100  
75  
50  
25  
0  
PPM

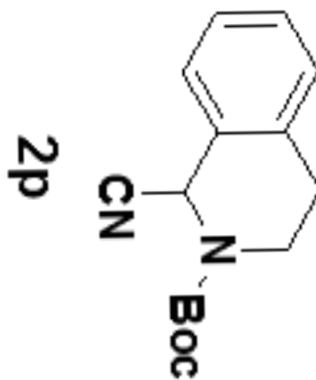

129.4505  
129.4011  
129.3784  
128.7425  
127.1454  
127.0795

118.1964

77.3211  
77.2056  
77.0000  
76.6789

28.2542  
28.0978  
28.0484

400MHz, CDCl3

7.2696

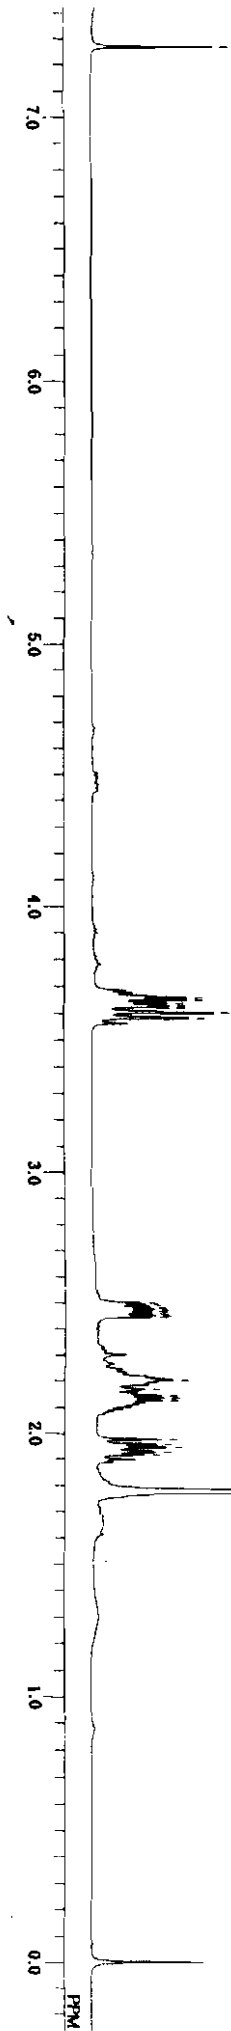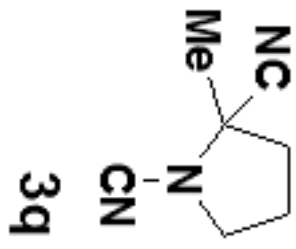

- 3.6617
- 3.6519
- 3.6397
- 3.6299
- 3.6238
- 3.6043
- 3.6836

- 2.5001
- 2.4928
- 2.4830
- 2.4757
- 2.4684
- 2.4598
- 2.4513
- 2.4440
- 2.2024
- 2.1682
- 2.1438
- 2.1340
- 2.1255
- 1.9779
- 1.9596
- 1.9461
- 1.9278
- 1.9193
- 1.7790

0.0000

100MHz, CDCl3

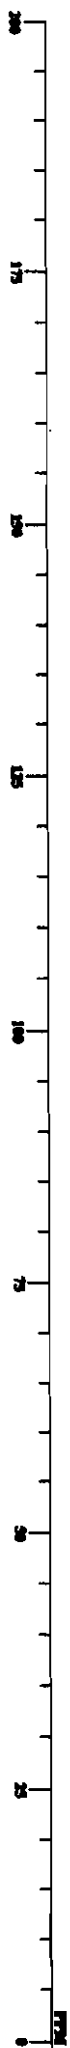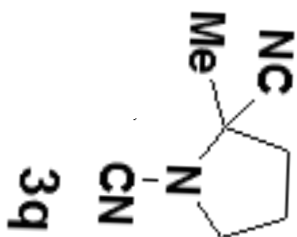

119.2831

112.7846

77.3128

77.0000

76.6789

59.5384

58.5648

39.1625

23.7344

23.5286

300MHz, CDCl3

7.2648

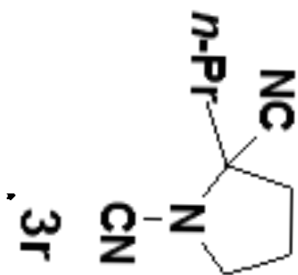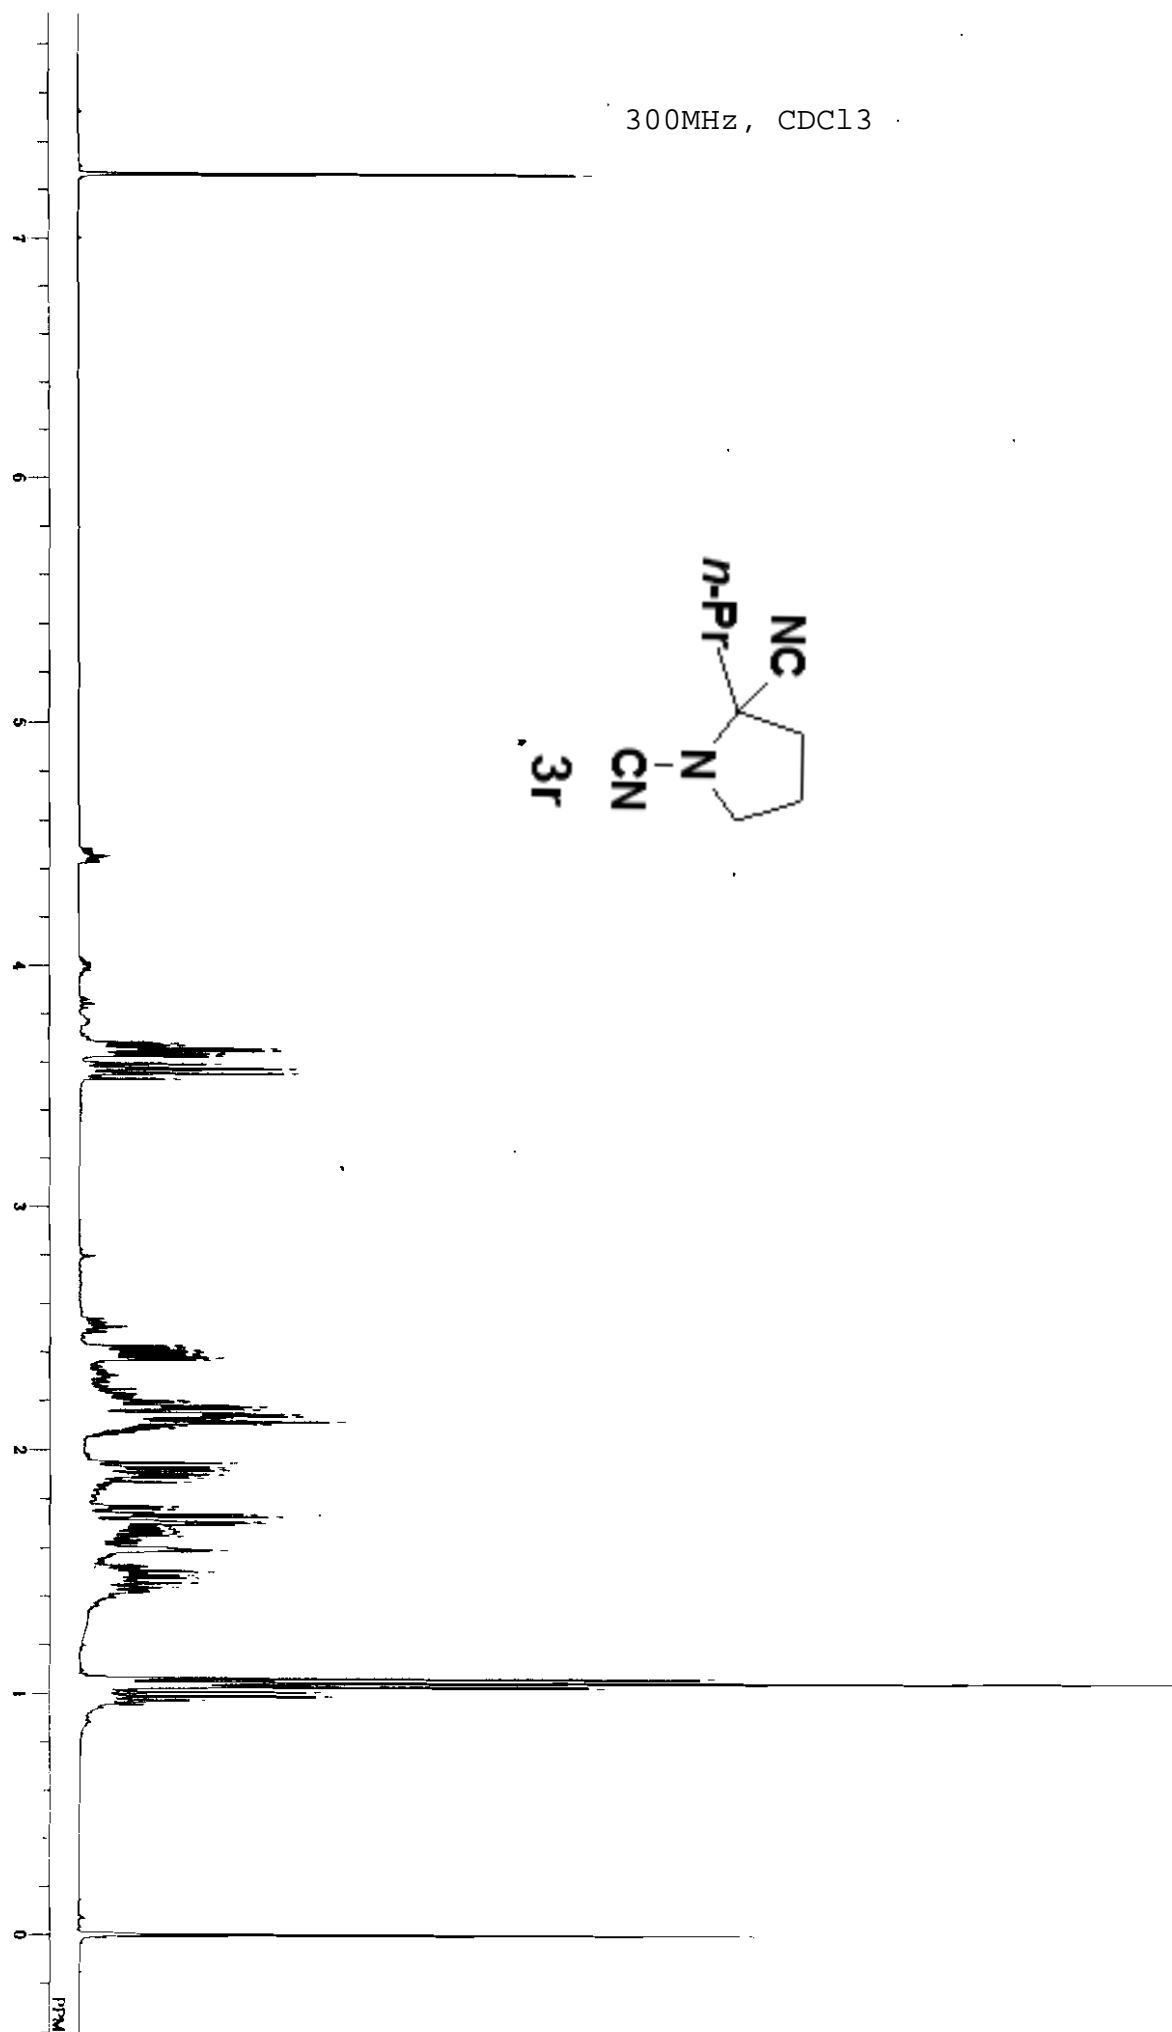

| Chemical Shift (ppm) |
|----------------------|
| 3.6800               |
| 3.6702               |
| 3.6568               |
| 3.6482               |
| 3.6348               |
| 3.6263               |
| 3.5933               |
| 3.5726               |
| 3.5543               |
| 3.5311               |
| 2.4269               |
| 2.4196               |
| 2.4098               |
| 2.4025               |
| 2.3939               |
| 2.3866               |
| 2.3781               |
| 2.3695               |
| 2.1999               |
| 2.1950               |
| 2.1792               |
| 2.1682               |
| 2.1475               |
| 2.1377               |
| 2.1255               |
| 2.1157               |
| 2.1084               |
| 2.0987               |
| 2.0913               |
| 1.9486               |
| 1.9303               |
| 1.9217               |
| 1.9169               |
| 1.9034               |
| 1.8985               |
| 1.8888               |
| 1.8717               |
| 1.7717               |
| 1.7607               |
| 1.7399               |
| 1.7302               |
| 1.7082               |
| 1.7033               |
| 1.6899               |
| 1.6789               |
| 1.6692               |
| 1.6606               |
| 1.6509               |
| 1.5923               |
| 1.5044               |
| 1.4861               |
| 1.4752               |
| 1.4556               |
| 1.4373               |
| 1.0627               |
| 1.0144               |
| 1.0261               |
| 1.0078               |
| 0.9895               |
| 0.9749               |

0.0000

100MHz, CDCl3

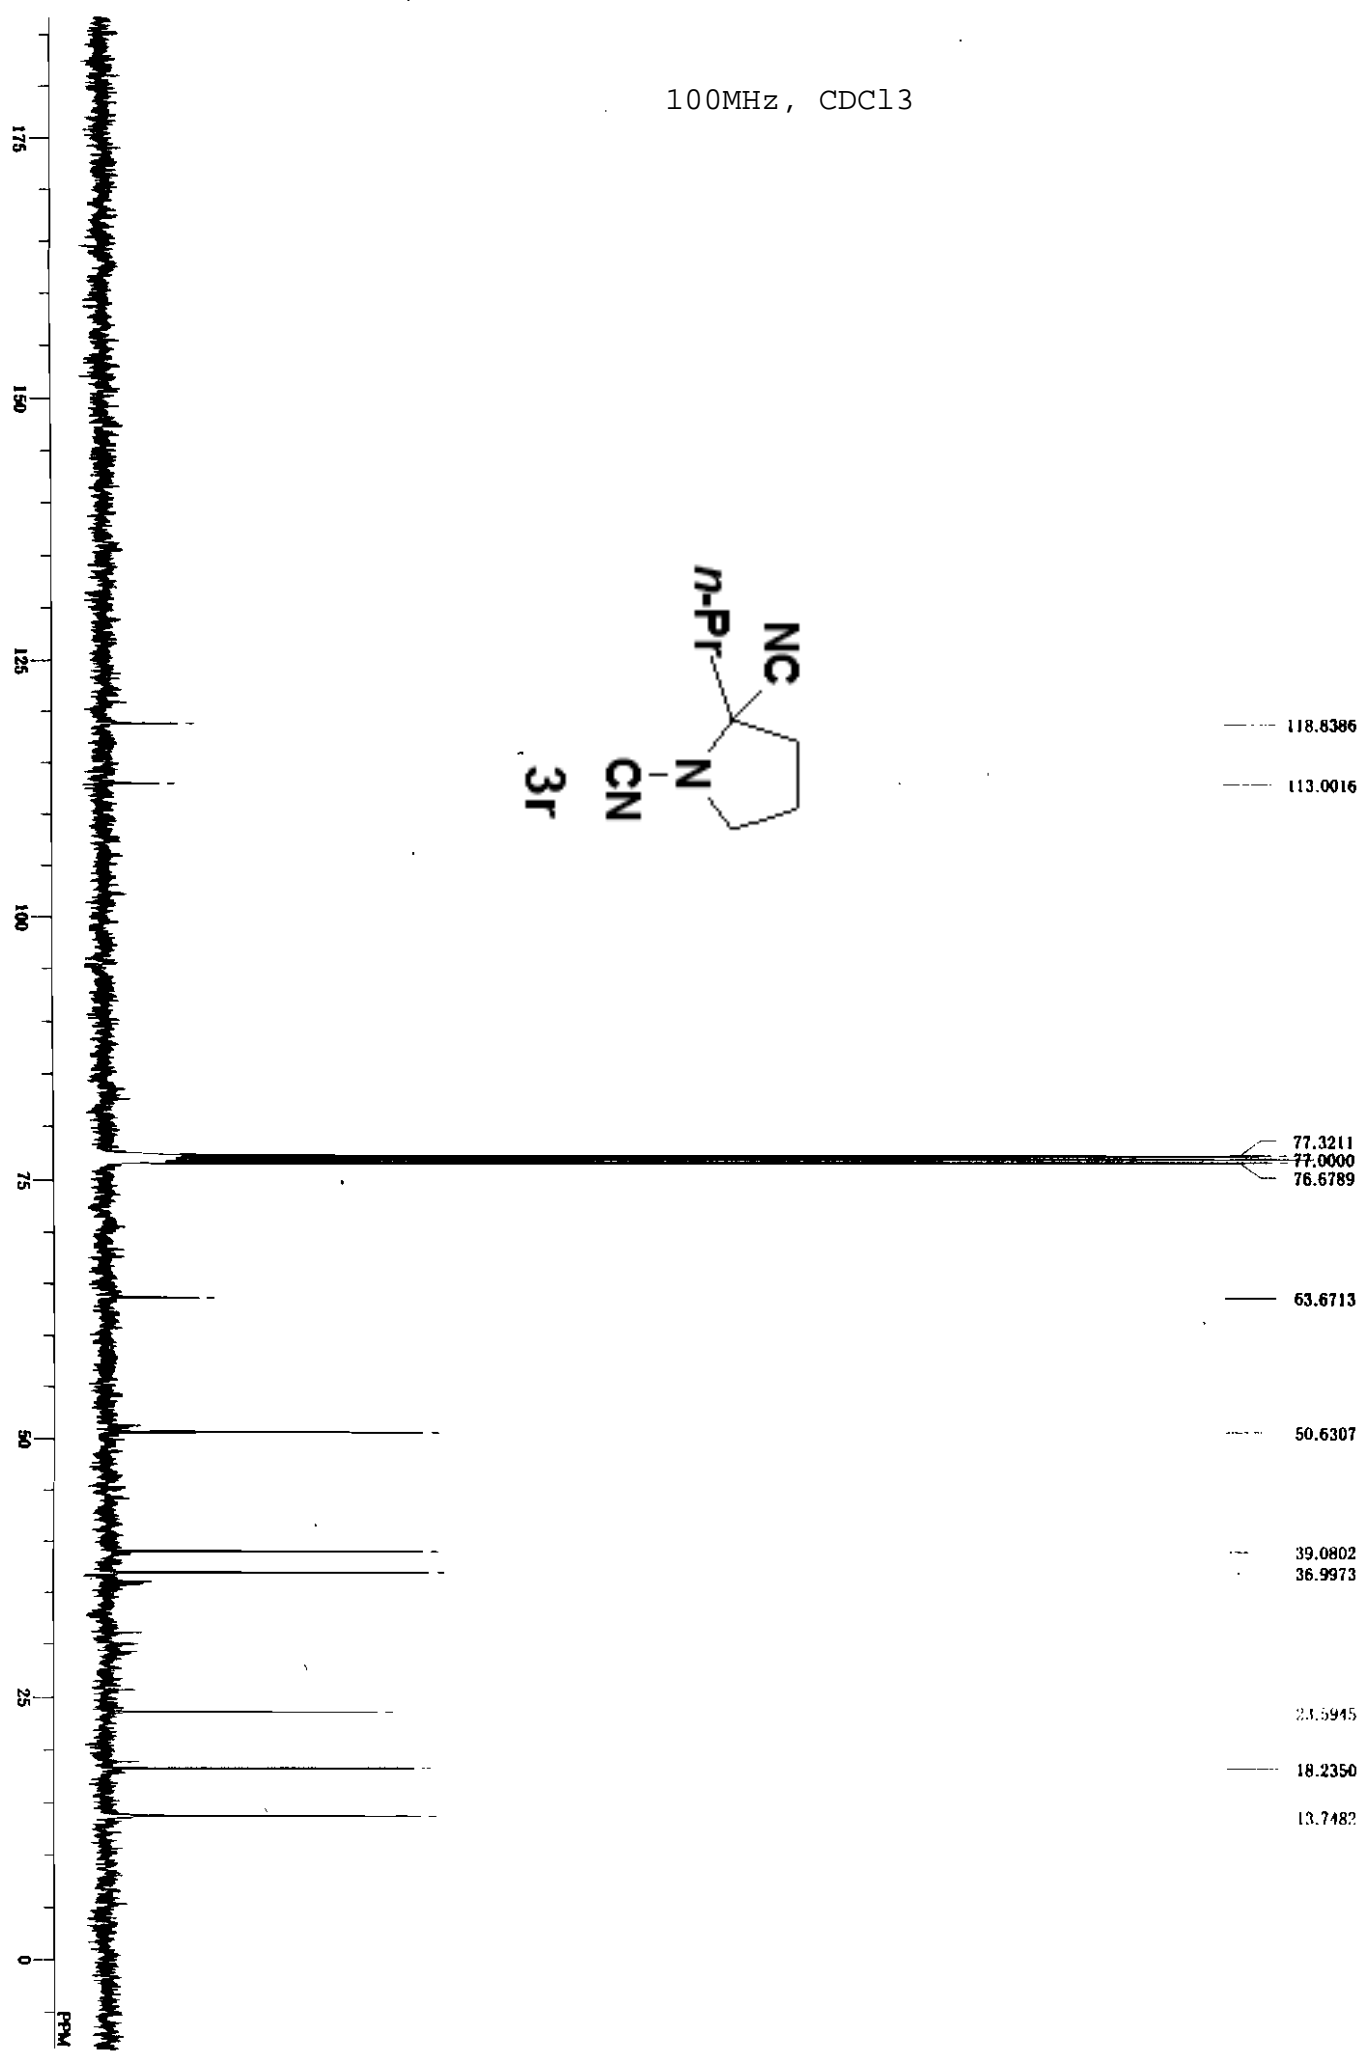

300MHz, CDCl3

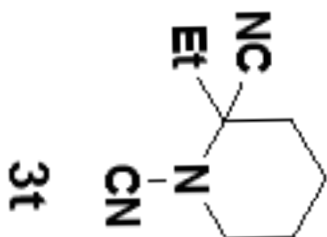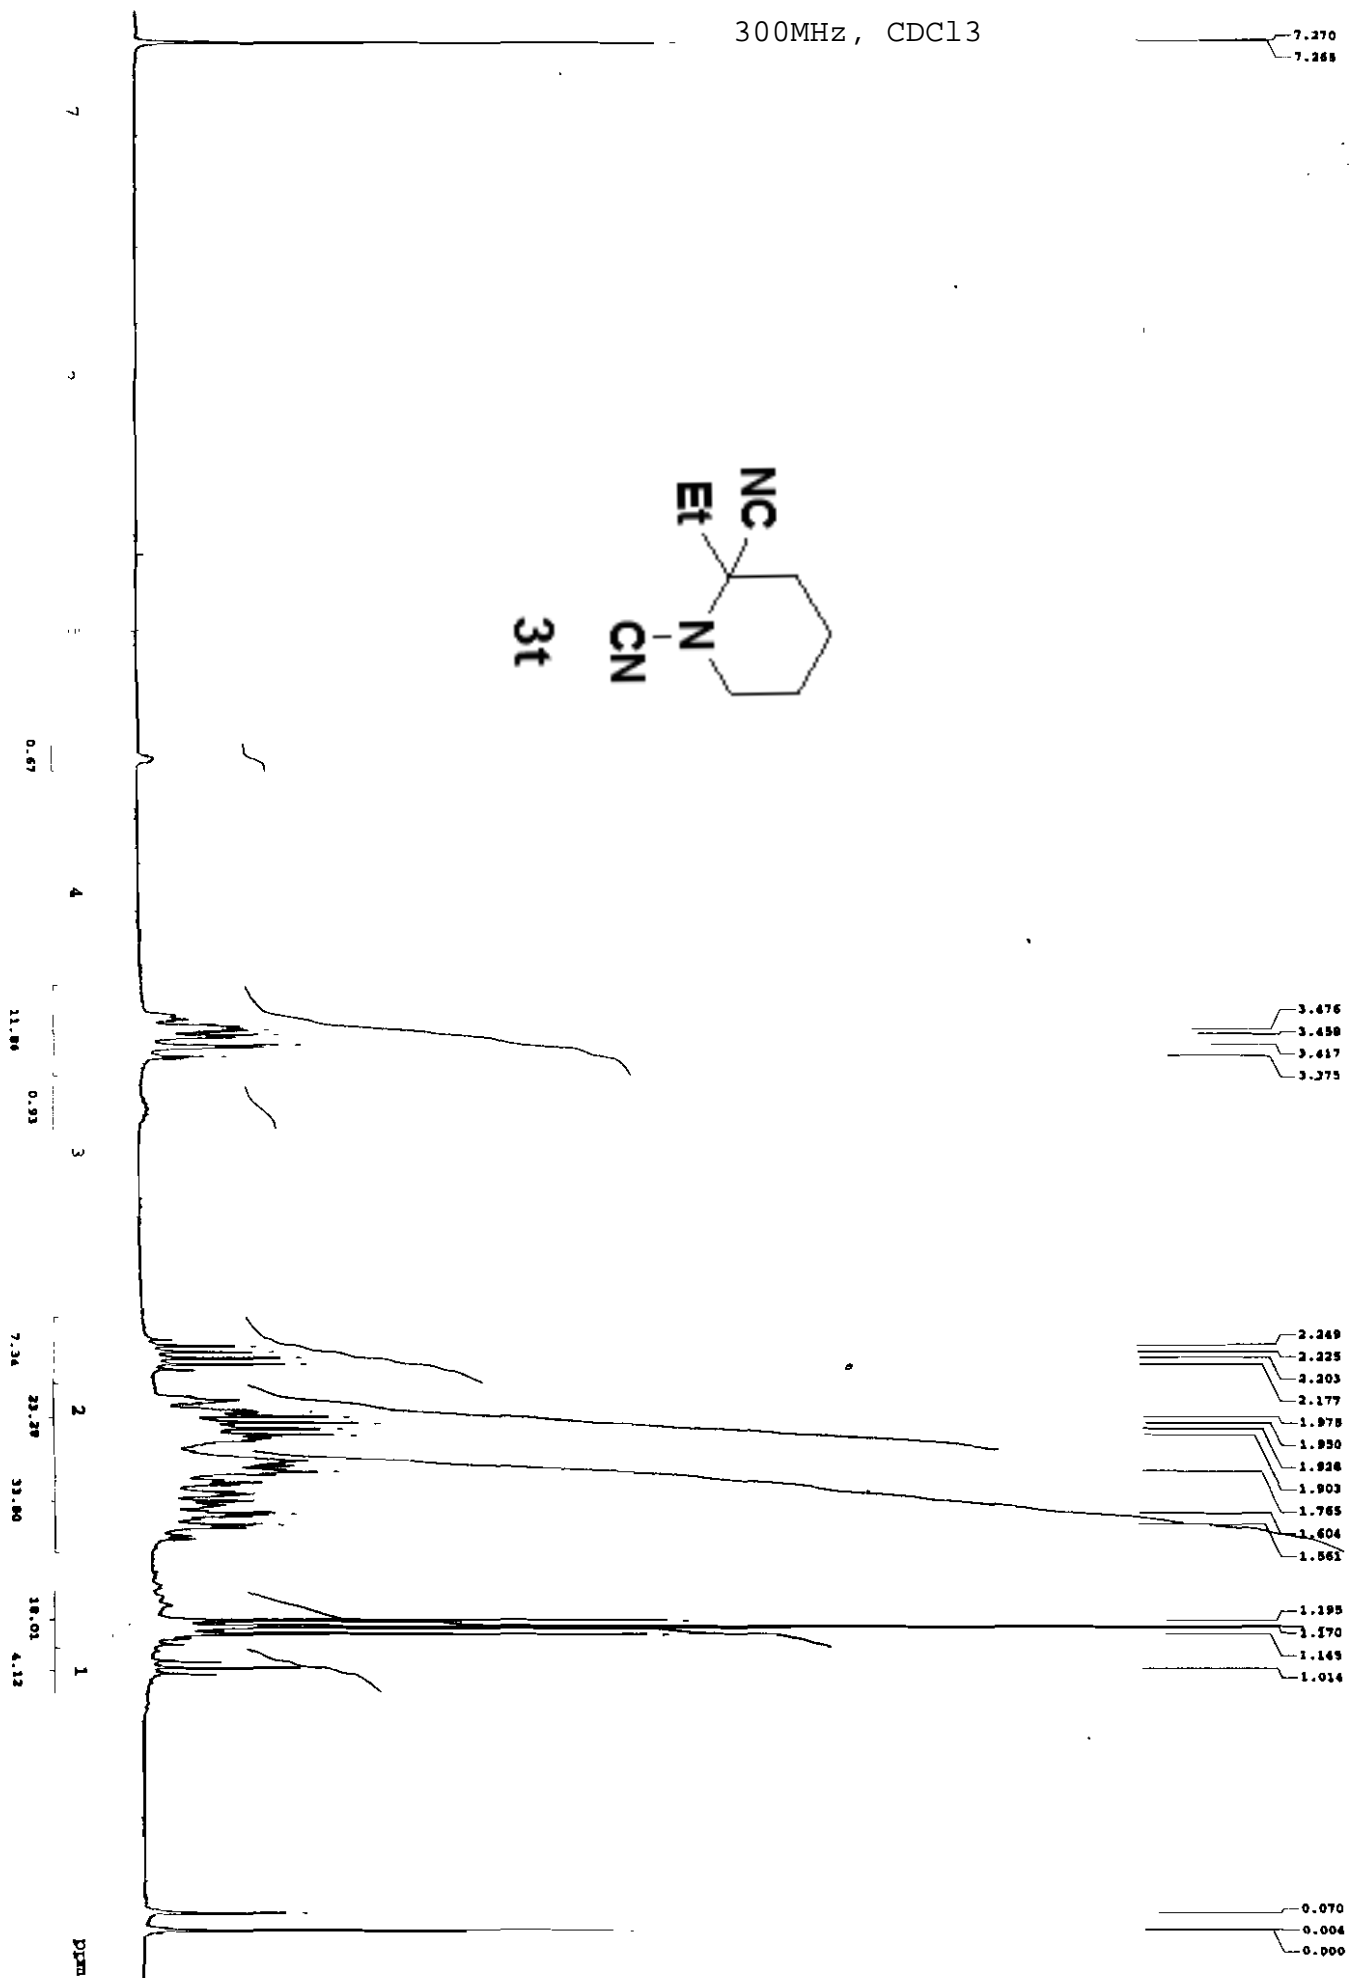

100MHz, CDCl3

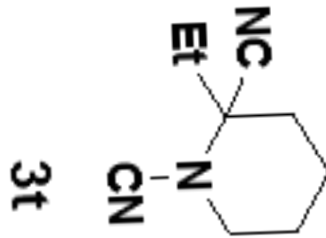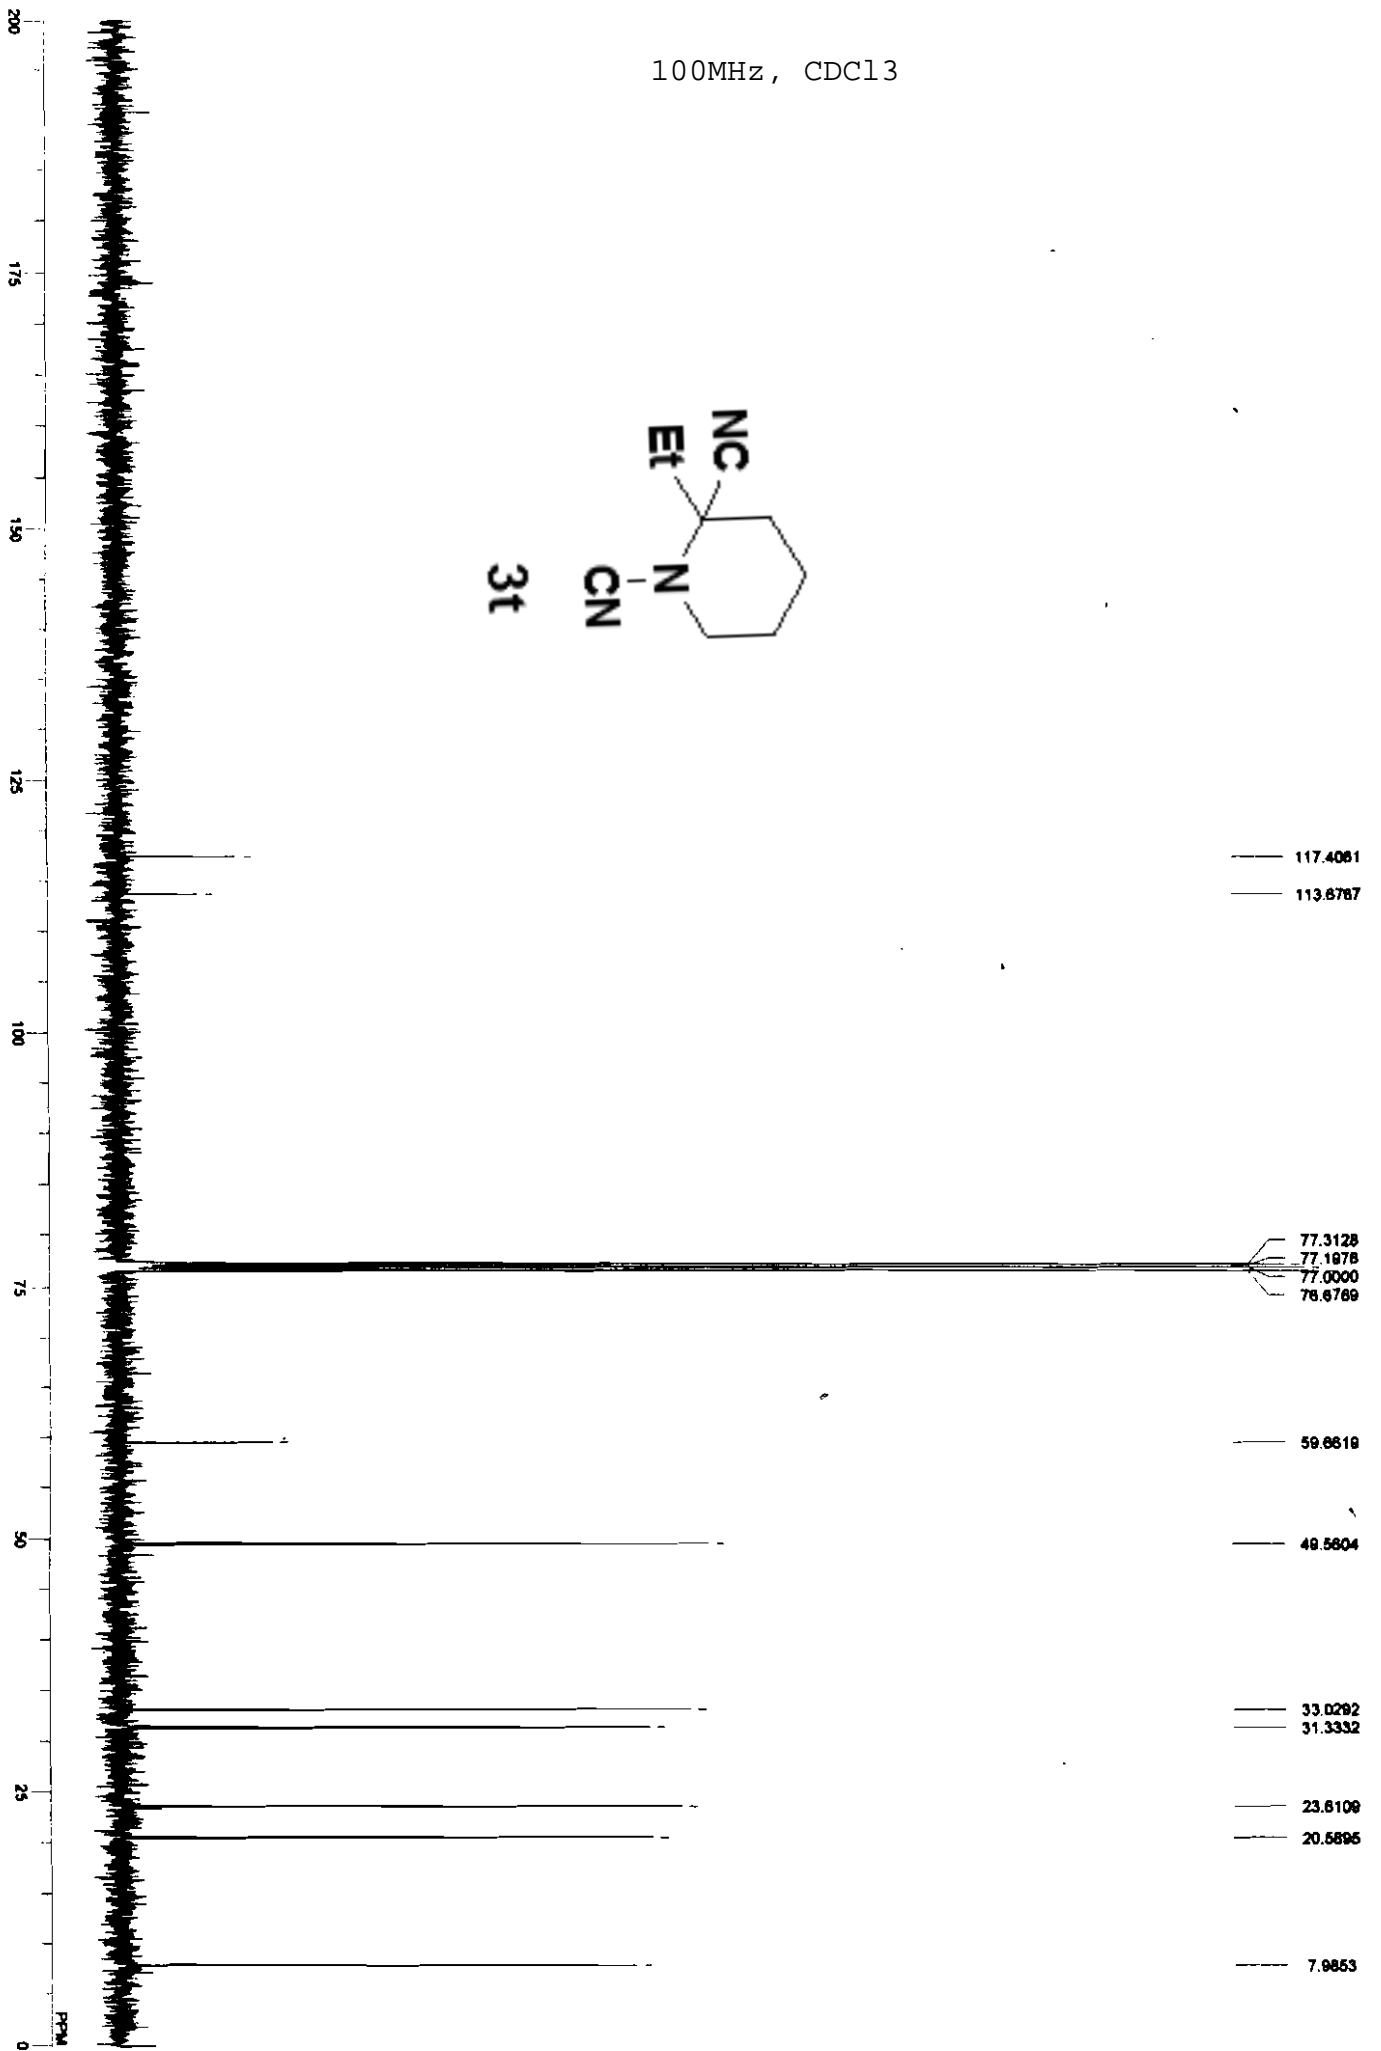

500MHz, CDCl<sub>3</sub>

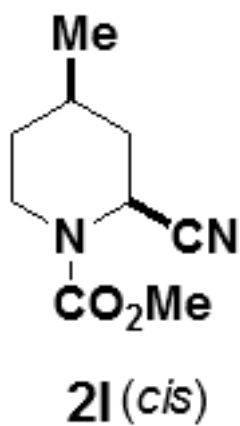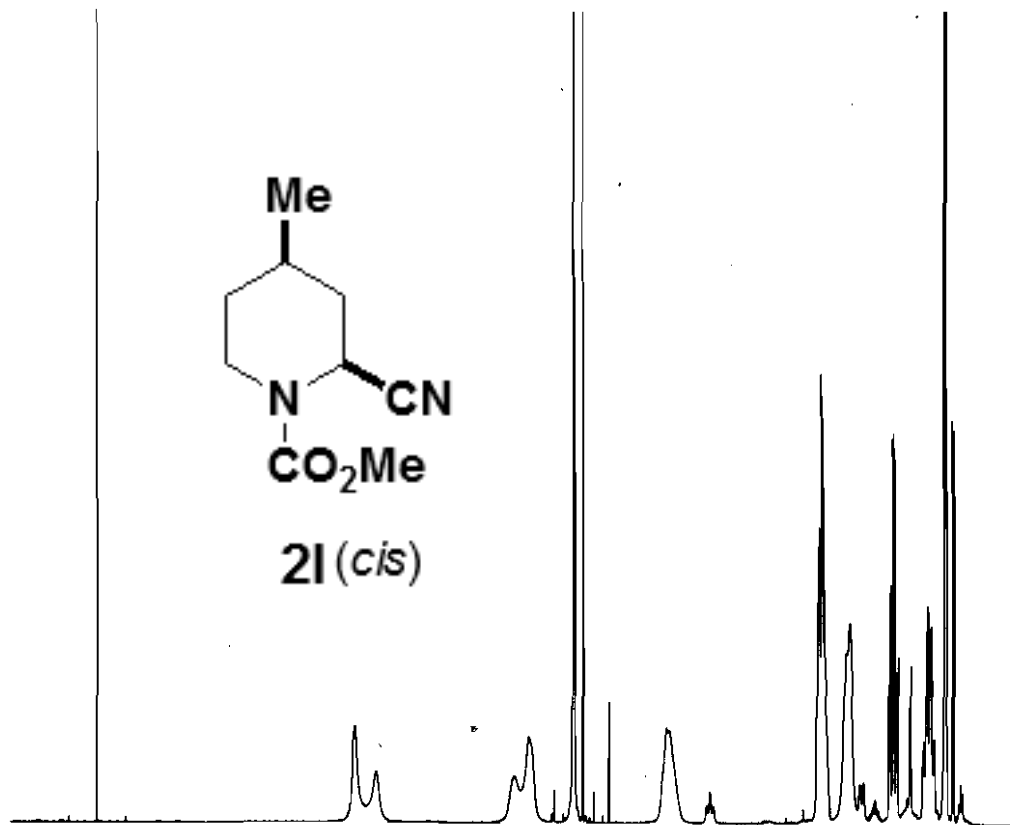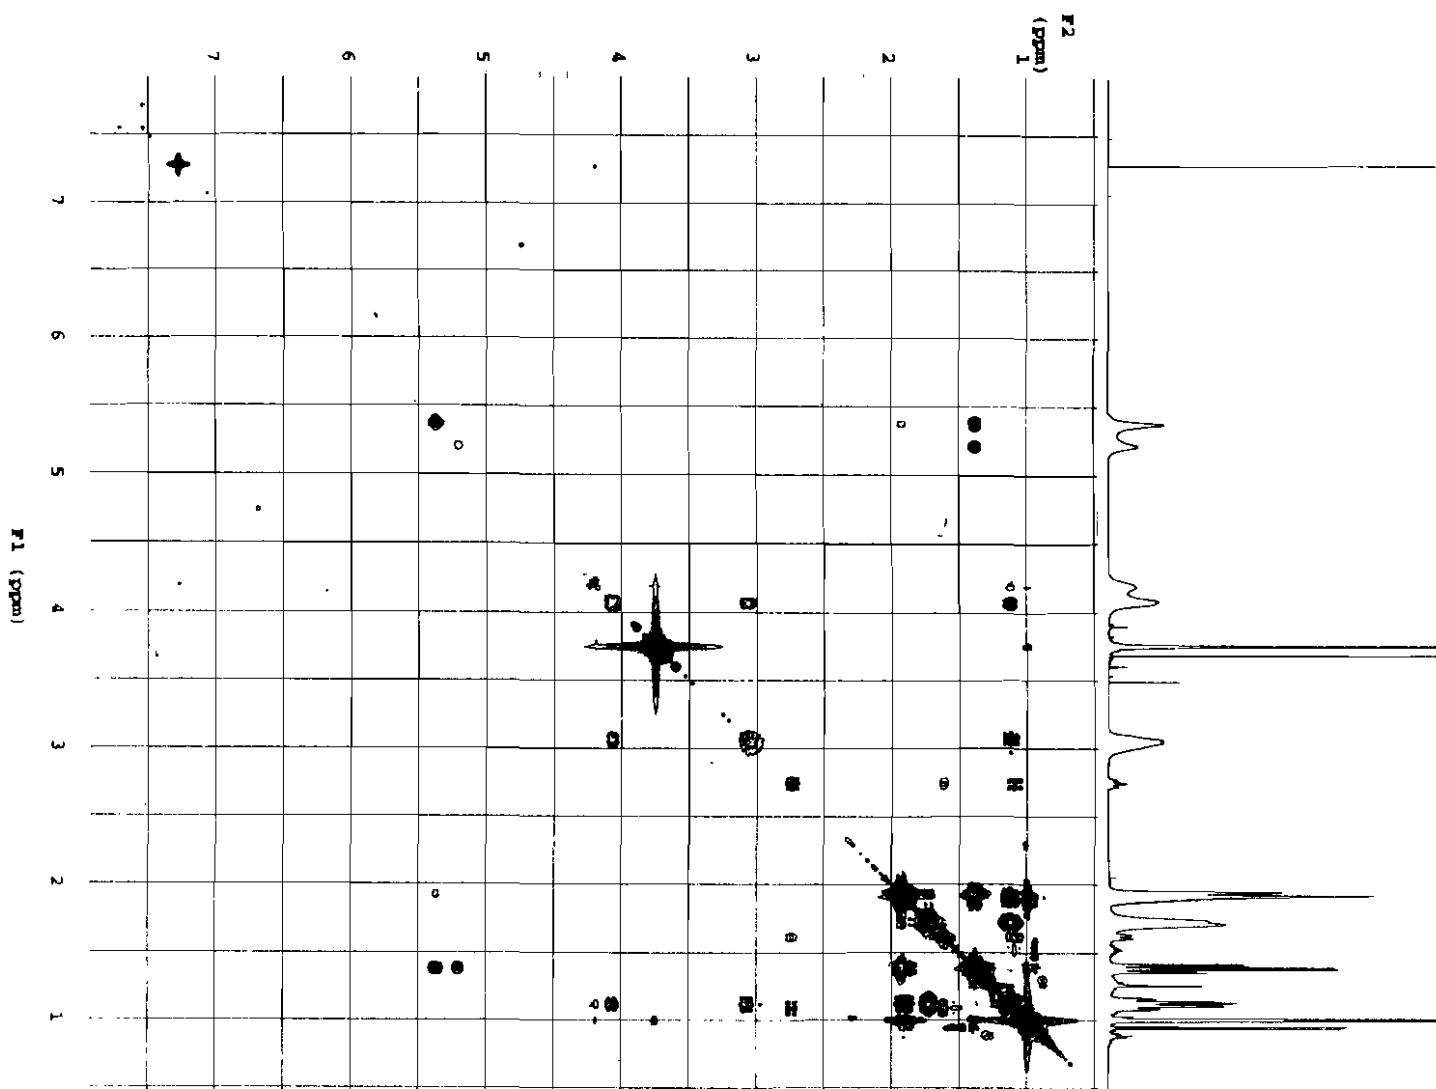



500MHz, CDCl<sub>3</sub>

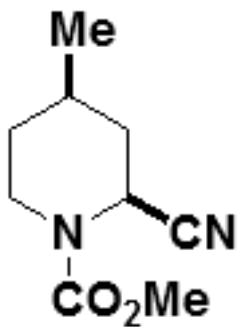

21 (*cis*)

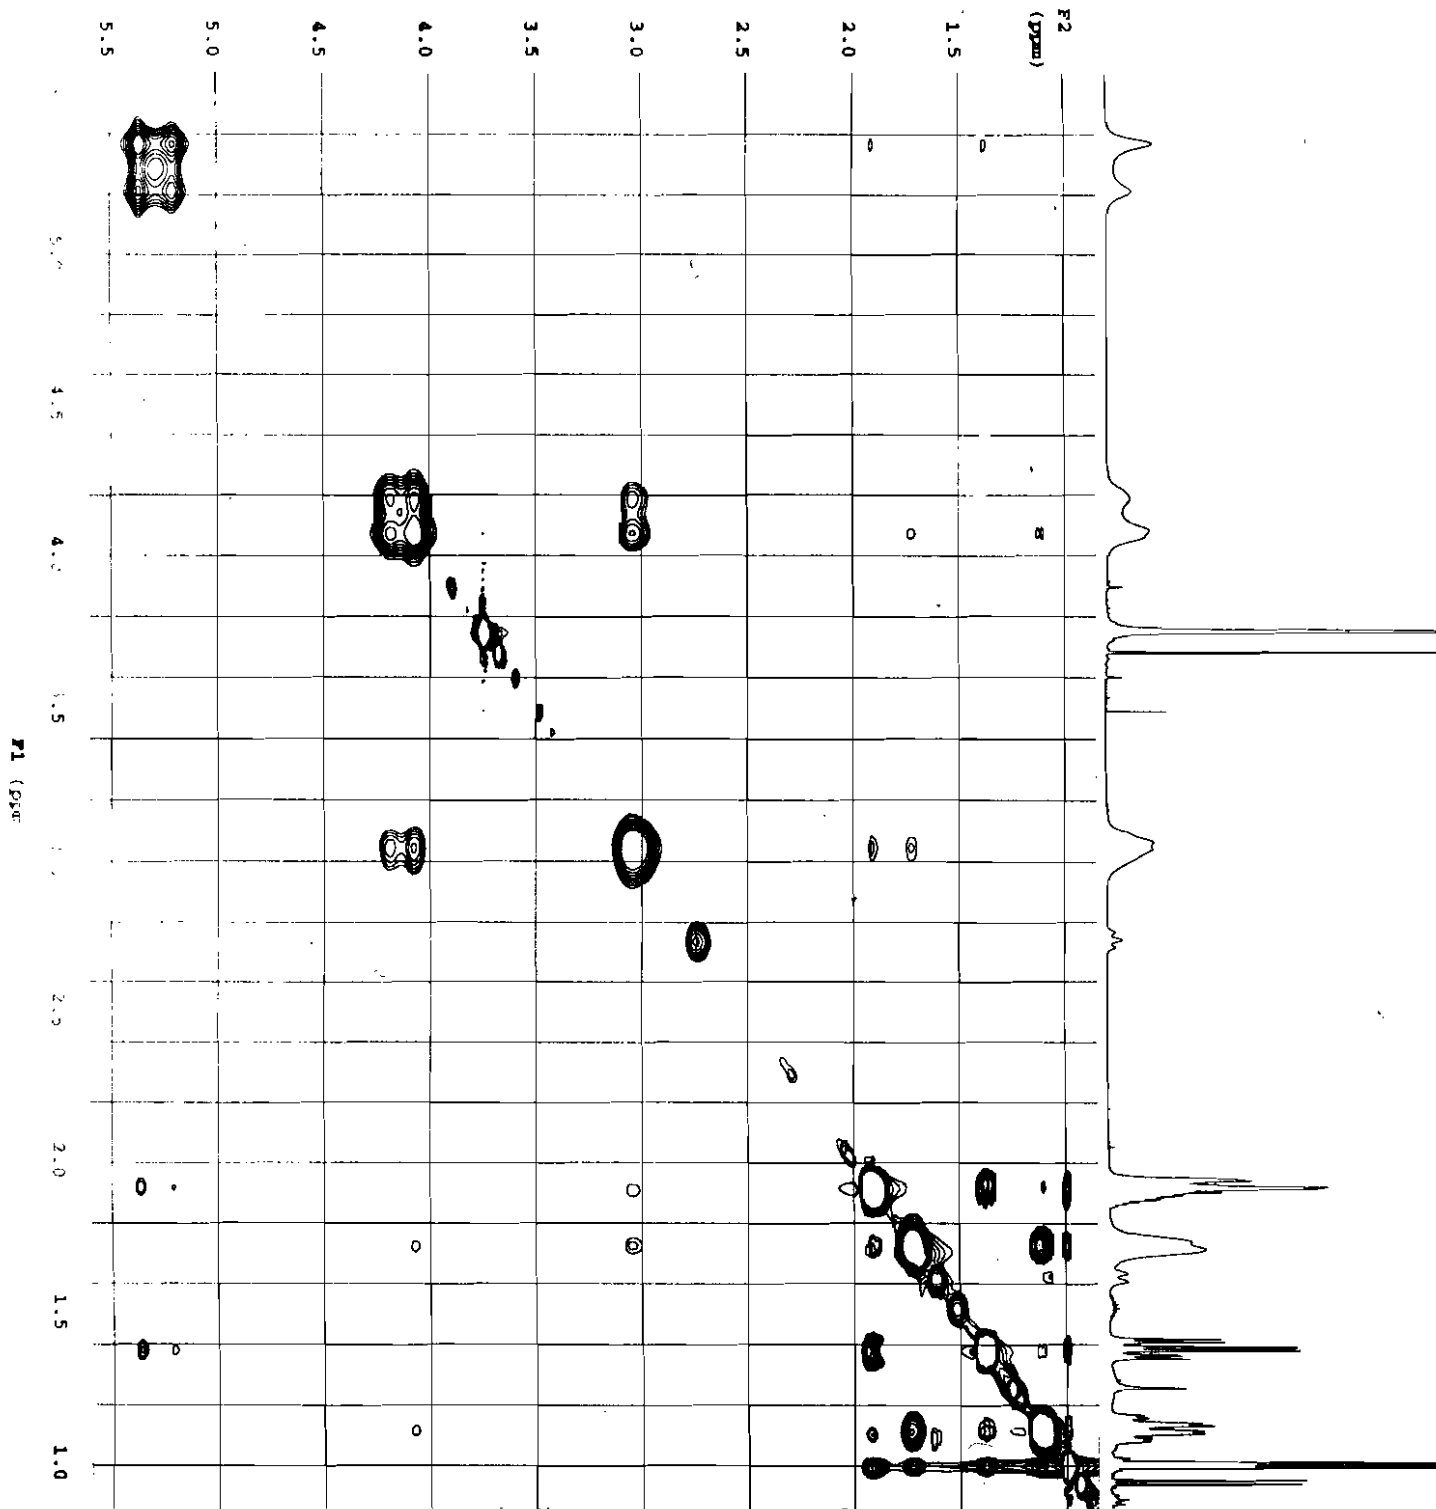

500MHz, CDCl3

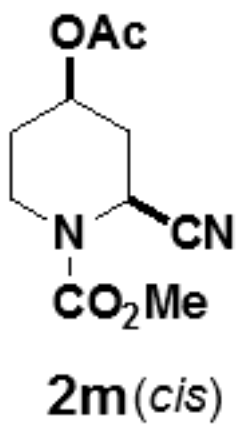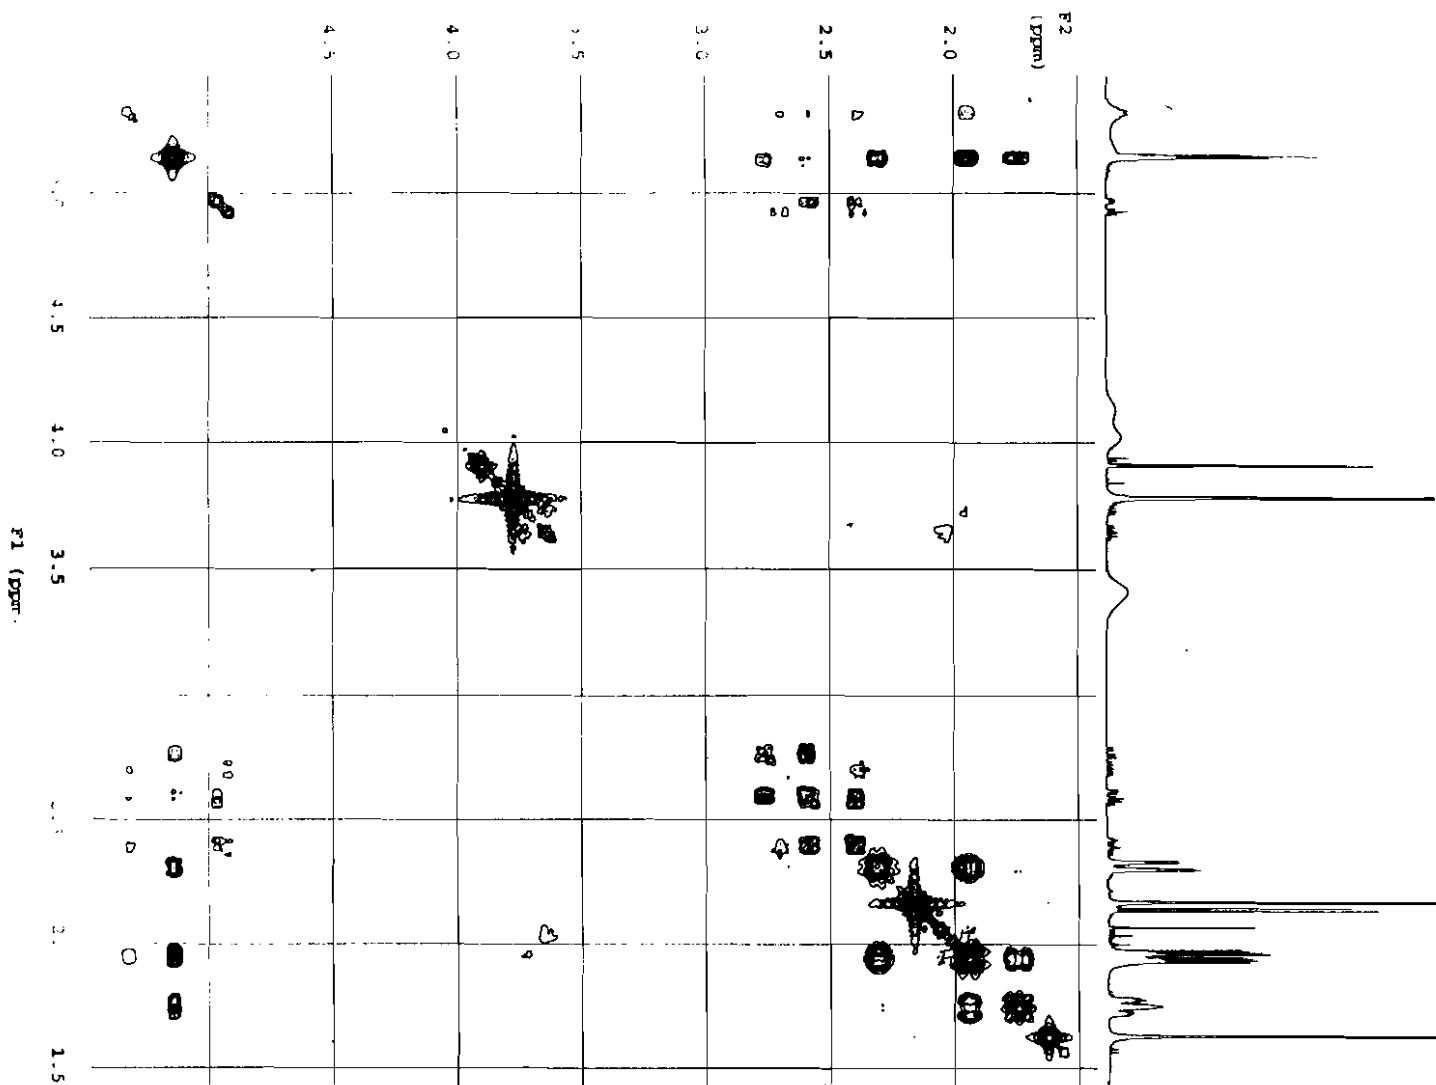

500MHz, CDCl3

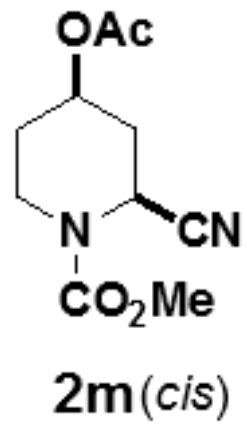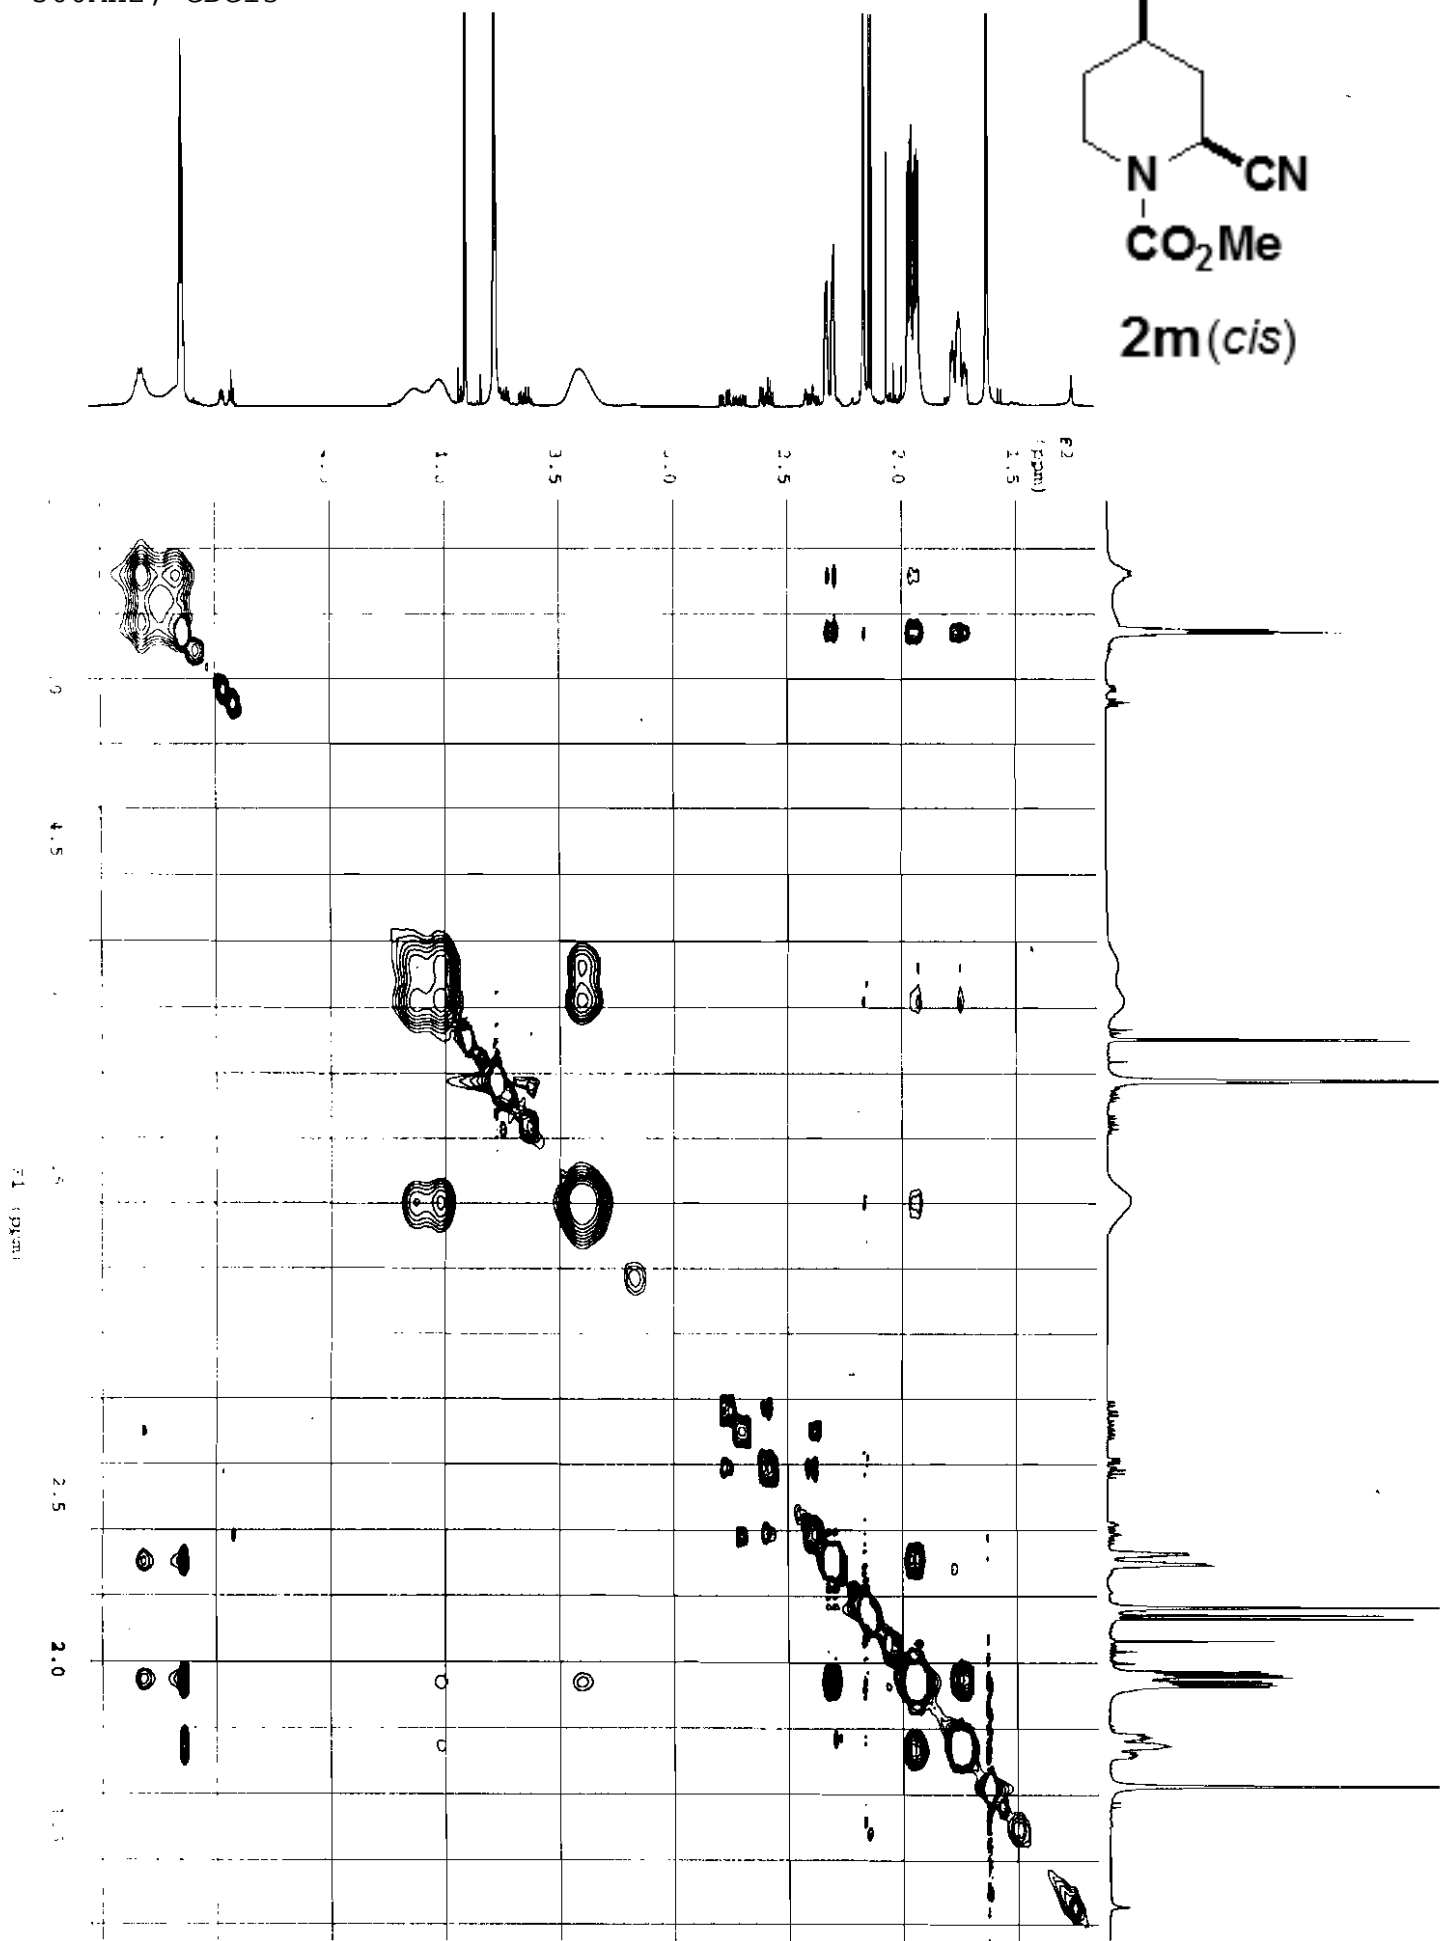

500MHz, CDCl3

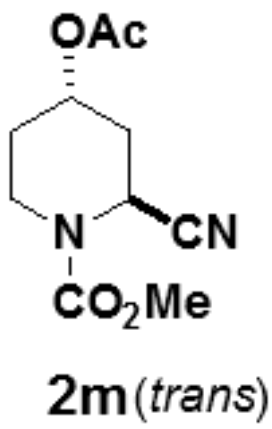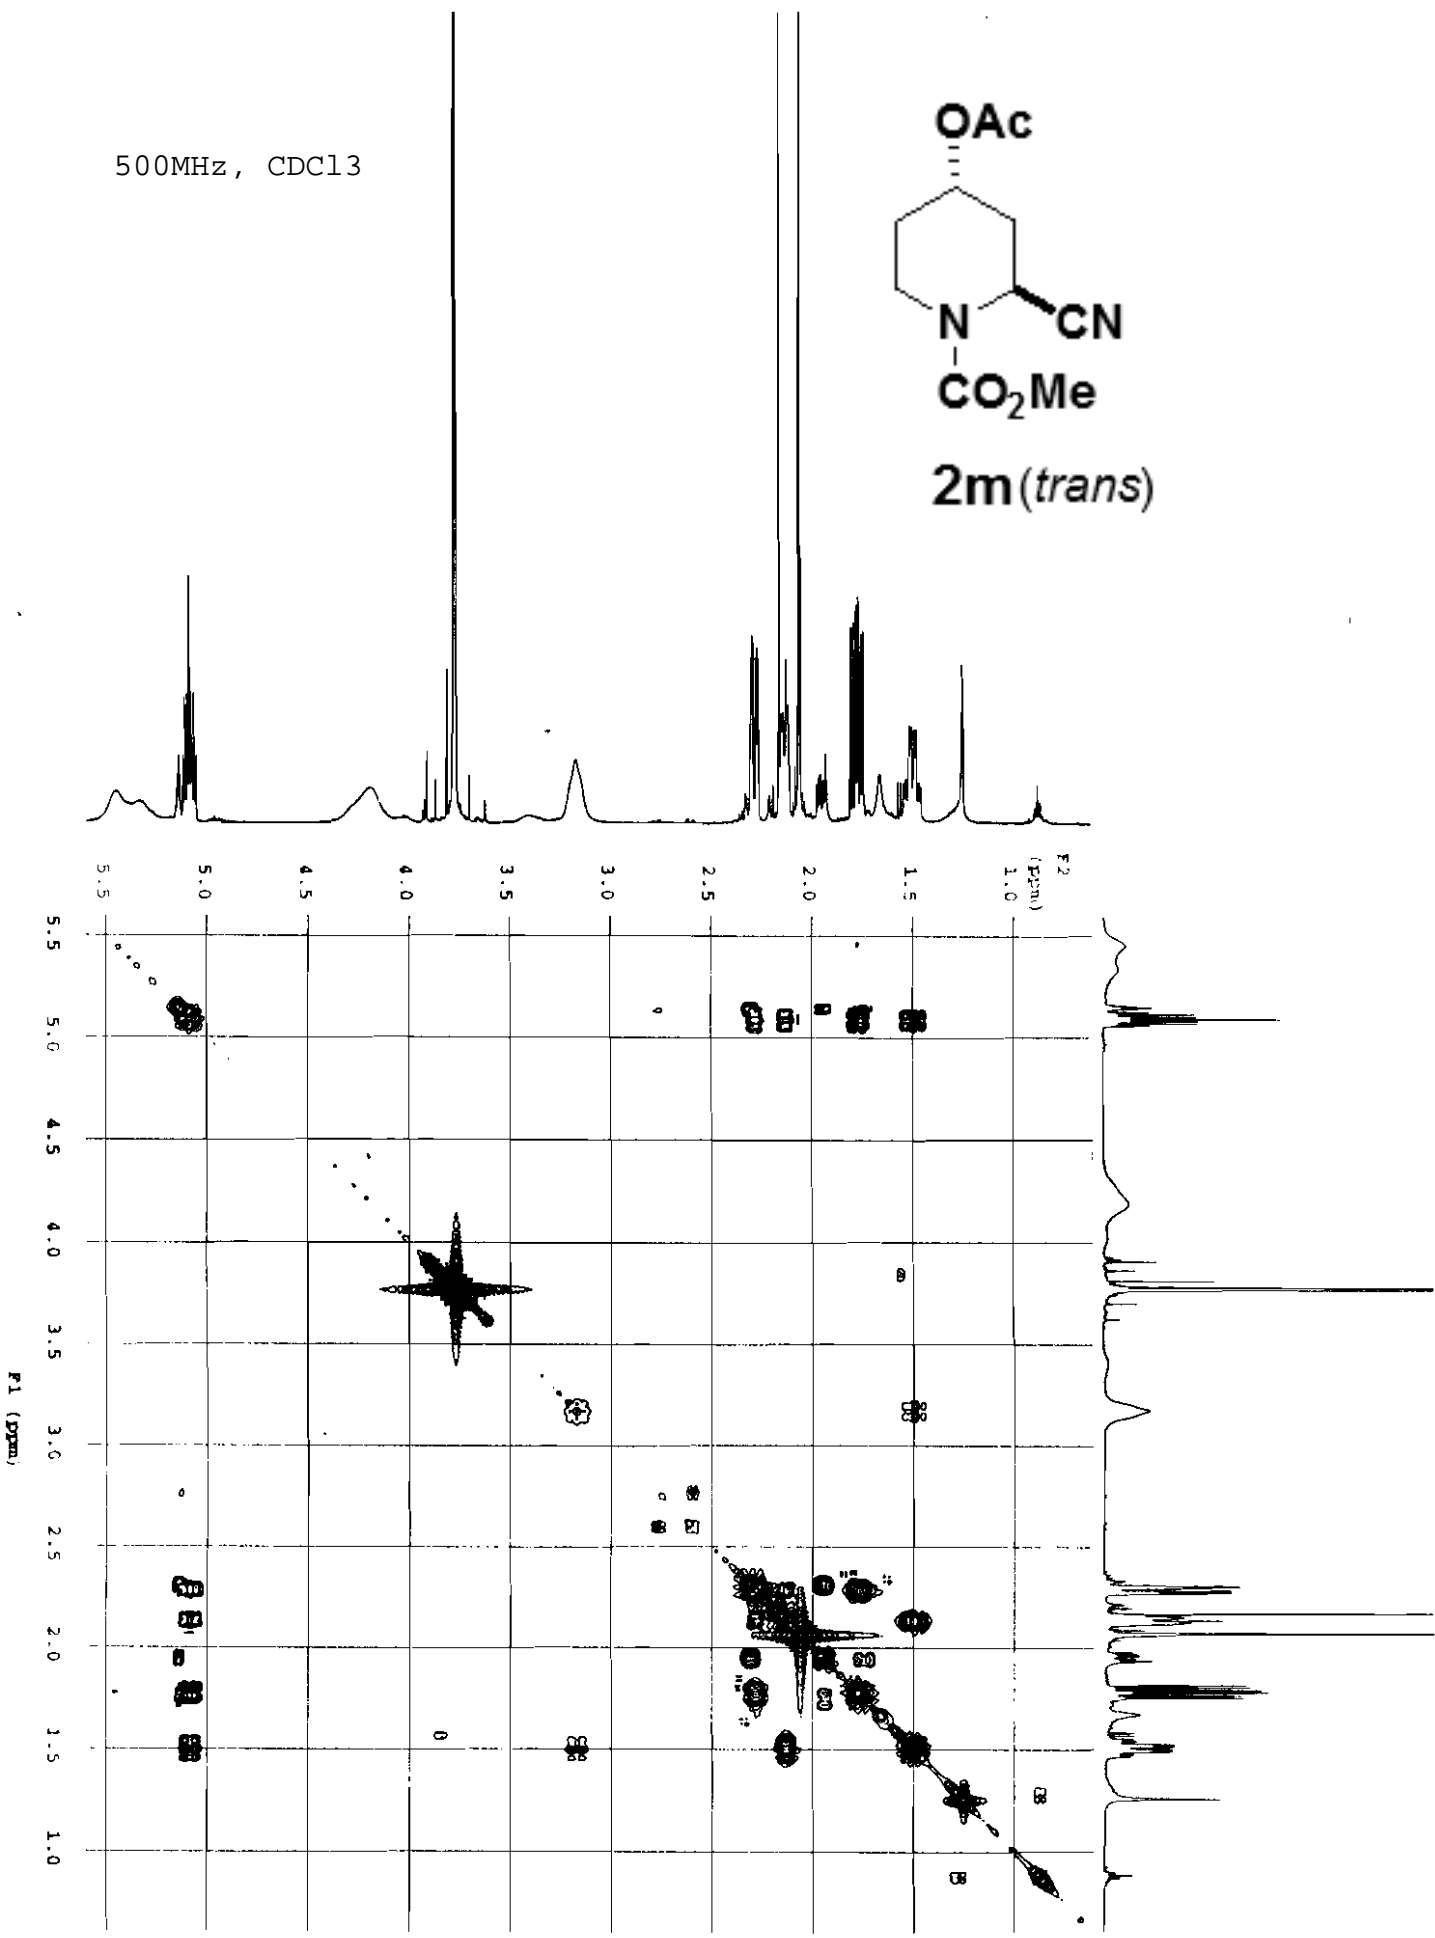

500MHz, CDCl<sub>3</sub>

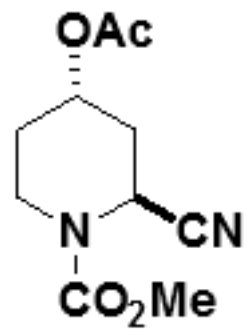

2m(*trans*)

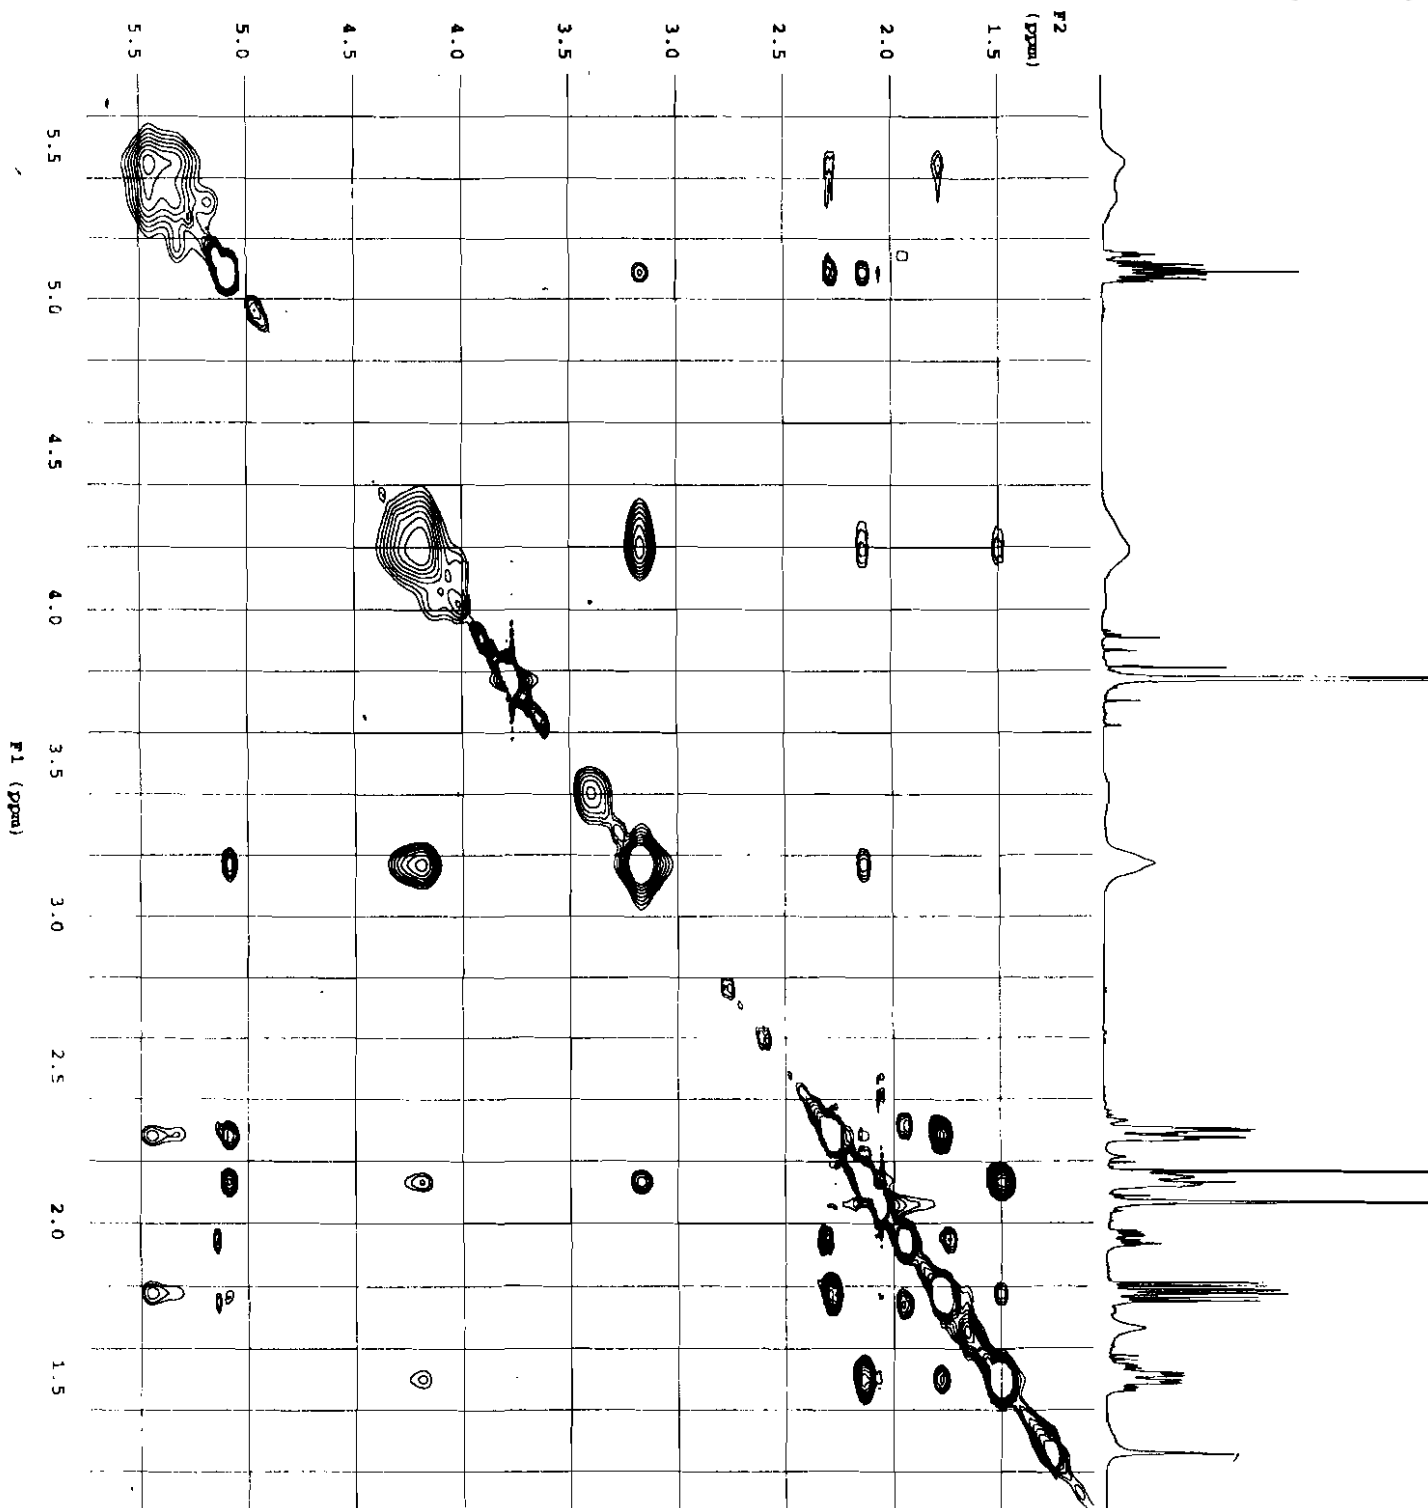

Supplement: b816598j.pdf [file b816598j.pdf]
